# Supplementary material for: COVID-19 virtual patient cohort reveals immune mechanisms driving disease outcomes
Source: bioRxiv or medRxiv preprint supplement (doi:10.1101/2021.01.05.425420), 2021-01-06
Supplement: Supplementary file [file media-1.pdf]

# Supplementary Information for: COVID-19 virtual patient cohort reveals immune mechanisms driving disease outcomes

Adrienne L. Jenner, Rosemary A. Aogo, Sofia Alfonso, Vivienne Crowe, Amanda P. Smith, Penelope A. Morel, Courtney L. Davis, Amber M. Smith, Morgan Craig

Correspondence to: [morgan.craig@umontreal.ca](mailto:morgan.craig@umontreal.ca)

In the Supplementary Information, we detail the full model equations (Section S1), the parameters and their values (Section S2), and how parameters were estimated (Section S3-S5). Parameters in the model were either obtained from the literature (Section S3), through fitting to dose response data (Section S4.1) or through fitting to time-series measurements (Section S4.2). Remaining parameters were estimated through calculating homeostasis (Section S5). Validation against human SARS-CoV-2 infection measurements, and further information for the sensitivity analysis and virtual cohort simulations is also provided (Section S6). A summary of all variables and parameters in the full model (**Eqs. S1-S22**) can be found in **Table S1**.

## S1. Mathematical model of the immune response to SARS-CoV-2

To model the immune response to SARS-CoV-2 infection, we constructed a system of ordinary and delay differential equations (**Figure 1, Main Text**). The model considers a population of susceptible lung cells ( $S$ ) that become infected ( $I$ ) by SARS-CoV-2 virus ( $V$ ). Infected cells become damaged or dead ( $D$ ) through the virus induced lysis or immune involvement. Upon infection, cells begin secreting type I IFN ( $F_U, F_B$ ) which reduces viral infection and results in cells resistant to virus infection ( $R$ ).

Alveolar macrophages ( $M_{\Phi R}$ ) are activated by infected or dead cells and become inflammatory macrophages ( $M_{\Phi I}$ ) and begin secreting IL-6 ( $L_U, L_B$ ) and GM-CSF ( $G_U, G_B$ ). Monocytes ( $M$ ) are recruited by the presence of infected cells and stimulated by GM-CSF to differentiate into inflammatory macrophages. Neutrophils ( $N$ ) are recruited by G-CSF ( $C_U, C_B$ ) and contribute to bystander death of epithelial cells through the release of reactive oxygen species (ROS). CD8<sup>+</sup> T cells ( $T$ ) are recruited after a delay from initial infection and induce apoptosis in infected cells. Bound and unbound concentrations are modelled explicitly. Equations for these interactions are given below:

$$\frac{dV}{dt} = pI - \delta_{V,M\Phi} M_{\Phi I} V - \delta_{V,N} N V - d_V V, \quad S1$$

$$\frac{dS}{dt} = \lambda_S \left( 1 - \frac{S + I + R + D}{S_{max}} \right) S - \beta S V - \frac{\rho \delta_N S N^{h_N}}{N^{h_N} + IC_{50,N}^{h_N}}, \quad S2$$

$$\frac{dI}{dt} = \frac{\beta \epsilon_{F,I}}{F_B + \epsilon_{F,I}} S(t - \tau_I) V(t - \tau_I) - d_I I - \frac{\delta_N I N^{h_N}}{N^{h_N} + IC_{50,N}^{h_N}} - \delta_{I,M\Phi} M_{\Phi I} I - \delta_{I,T} T I, \quad S3$$

$$\frac{dR}{dt} = \lambda_S \left( 1 - \frac{S + I + R + D}{S_{max}} \right) R + \frac{\beta F_B}{F_B + \epsilon_{F,I}} S(t - \tau_I) V(t - \tau_I) - \frac{\rho \delta_N R N^{h_N}}{N^{h_N} + IC_{50,N}^{h_N}}, \quad S4$$

$$\begin{aligned} \frac{dD}{dt} = & d_I I + \frac{\delta_N (\rho S + \rho R + I) N^{h_N}}{N^{h_N} + IC_{50,N}^{h_N}} + \delta_{I,M\Phi} (M_{\Phi I}) I + \delta_{I,T} T I - d_D D \\ & + (\delta_{M\Phi,D} - \delta_{D,M\Phi}) (M_{\Phi R} + M_{\Phi I}) D, \end{aligned} \quad S5$$

$$\frac{dM_{\Phi R}}{dt} = -a_{I,M\Phi} M_{\Phi R} (I + D) - \delta_{M\Phi,D} D M_{\Phi R} + \left( 1 - \frac{M_{\Phi R}}{M_{\Phi max}} \right) \frac{\lambda_{M\Phi} M_{\Phi I}}{V + \epsilon_{V,M\Phi}} - d_{M\Phi R} M_{\Phi R}, \quad S6$$

$$\begin{aligned} \frac{dM_{\Phi I}}{dt} = & a_{I,M\Phi} M_{\Phi R} (I + D) + \frac{p_{M_{\Phi I},G} G_B^{h_{M,M\Phi}} M}{G_B^{h_{M,M\Phi}} + \epsilon_{G,M_{\Phi I}}} + \frac{p_{M_{\Phi I},L} L_B M}{L_B + \epsilon_{L,M_{\Phi}}} - d_{M_{\Phi I}} M_{\Phi I} - \delta_{M_{\Phi},D} D M_{\Phi I} \\ & - \left(1 - \frac{M_{\Phi R}}{M_{\Phi max}}\right) \frac{\lambda_{M_{\Phi}} M_{\Phi I}}{V + \epsilon_{V,M_{\Phi}}}, \end{aligned} \quad S7$$

$$\begin{aligned} \frac{dM}{dt} = & \left( M_{prod}^* + (\psi_M^{max} - M_{prod}^*) \frac{G_B^{h_M}}{G_B^{h_M} + \epsilon_{G,M}} \right) M_R + \frac{p_{M,I} I M}{I + \epsilon_{I,M}} - \frac{p_{M_{\Phi I},G} G_B^{h_{M,M\Phi}} M}{G_B^{h_{M,M\Phi}} + \epsilon_{G,M_{\Phi I}}} \\ & - \frac{p_{M_{\Phi I},L} L_B M}{L_B + \epsilon_{L,M_{\Phi}}} - d_M M, \end{aligned} \quad S8$$

$$\frac{dN}{dt} = \left( N_{prod}^* + (\psi_N^{max} - N_{prod}^*) \frac{C_{BF} - C_{BF}^*}{C_{BF} - C_{BF}^* + \epsilon_{C,N}} \right) N_R + \frac{p_{N,L} L_B}{L_B + \epsilon_{L,N}} - d_N N, \quad S9$$

$$\frac{dT}{dt} = \frac{p_{T,I} I (t - \tau_T) \epsilon_{L,T}}{L_B + \epsilon_{L,T}} + \frac{p_{T,F} F_B T}{F_B + \epsilon_{F,T}} - d_T T, \quad S10$$

$$\begin{aligned} \frac{dL_U}{dt} = & \frac{p_{L,I} I}{I + \eta_{L,I}} + \frac{p_{L,M_{\Phi I}} M_{\Phi I}}{M_{\Phi I} + \eta_{L,M_{\Phi I}}} + \frac{p_{L,M} M}{M + \eta_{L,M}} - k_{lin_L} L_U - k_{B_L} ((M + N + T) A_L - L_B) L_U \\ & + k_{U_L} L_B, \end{aligned} \quad S11$$

$$\frac{dL_B}{dt} = -k_{int_L} L_B + k_{B_L} ((M + N + T) A_L - L_B) L_U - k_{U_L} L_B, \quad S12$$

$$\frac{dG_U}{dt} = \frac{p_{G,M_{\Phi I}} M_{\Phi I}}{M_{\Phi I} + \eta_{G,M_{\Phi}}} + \frac{p_{G,M} M}{M + \eta_{G,M}} - k_{lin_G} G_U - k_{B_G} (M A_G - G_B) G_U + k_{U_G} G_B, \quad S13$$

$$\frac{dG_B}{dt} = -k_{int_G} G_B + k_{B_G} (M A_G - G_B) G_U - k_{U_G} G_B, \quad S14$$

$$\frac{dC_U}{dt} = \frac{p_{C,M} M}{M + \eta_{C,M}} - k_{lin_C} C_U - k_{B_C} (N A_C - C_B) (C_U)^{POW} + k_{U_C} C_B, \quad S15$$

$$\frac{dC_B}{dt} = -k_{int_C} C_B + k_{B_C} (N A_C - C_B) (C_U)^{POW} - k_{U_C} C_B, \quad S16$$

$$\frac{dF_U}{dt} = \frac{p_{F,I} I}{I + \eta_{F,I}} + \frac{p_{F,M_{\Phi I}} M_{\Phi I}}{M_{\Phi I} + \eta_{F,M_{\Phi I}}} + \frac{p_{F,M} M}{M + \eta_{F,M}} - k_{lin_F} F_U - k_{B_F} ((T + I) A_F - F_B) F_U + k_{U_F} F_B, \quad S17$$

$$\frac{dF_B}{dt} = -k_{int_F} F_B + k_{B_F} ((T + I) A_F - F_B) F_U - k_{U_F} F_B, \quad S18$$

where

$$A_L = \frac{MM_L}{6.02214 \times 10^{23}} (K_{L,N} + K_{L,T} + K_{L,M}) \cdot \left(\frac{10^{-3}}{5000}\right), \quad S19$$

$$A_G = \frac{MM_G}{6.02214 \times 10^{23}} K_{G,M} \cdot \left(\frac{10^{-3}}{5000}\right), \quad S20$$

$$A_C = \hat{p} \frac{MM_C}{6.02214 \times 10^{23}} K_{C,N} \cdot \left(\frac{10^1}{5000}\right), \quad S21$$

$$A_F = \frac{MM_F}{6.02214 \times 10^{23}} (K_{F,T} + K_{F,I}) \cdot \left(\frac{10^{-3}}{5000}\right). \quad S22$$

## S2. Model parameter values

A summary of each parameter value in **Eqs. S1-S22** is provided in **Table S1** with references. If the value was obtained through fitting, a reference to the relevant figure is provided. A summary of the variables in the model is given at the end of **Table S1**.

**Table S1 Parameter values used in the Main Text.** Parameters have been grouped into: (a-e) cell related, (f-k) cytokine related parameters (l) and initial conditions. Relevant references are given estimated parameters. Parameters obtained through fitting to data in the literature have the appropriate figure noted in the Info column. Parameters estimated from homeostasis calculation are denoted by H or qualitatively estimated by E. Parameters whose value was taken from another parameters estimated has that parameter noted. Viral load is reported as virion copies and cells have been noted in  $10^9$  cells. Time  $t$  is in days. The final sub-table (m) is a list of the variables in the model.

### a) Viral kinetic parameters

| Param             | Units                                   | Description                              | Value          | Ref | Info   |
|-------------------|-----------------------------------------|------------------------------------------|----------------|-----|--------|
| $p$               | 1/day $\times$ cop/ml<br>/ $10^9$ cells | Lytic viral production rate              | 741            | 1   | Fig 2  |
| $\lambda_S$       | 1/day                                   | Proliferation of epithelial cells        | 0.74           | 2   | Fig S2 |
| $S_{max}$         | $10^9$ cells                            | Epithelial cells carrying capacity       | $S_0$          | 3   |        |
| $\lambda_{M\Phi}$ | cop/ml/day                              | Production of alveolar macrophages       | 5943           | 4   | Fig S3 |
| $M_{\Phi max}$    | $10^9$ cells/ml                         | Alveolar macrophage carrying capacity    | $M_{\Phi R,0}$ |     | Fig S3 |
| $\beta$           | 1/day $\times$<br>1/log(cop/ml)         | SARS-CoV-2 virus infection rate          | 0.29           | 1   | Fig 2  |
| $\tau_I$          | day                                     | Eclipse time                             | 0.17           | 5   |        |
| $d_I$             | 1/day                                   | Death rate of infected cells             | 0.014          |     | Fig 2  |
| $\tau_T$          | 1/day                                   | Delay in CD8 <sup>+</sup> T cell arrival | 4.5            | 6   |        |

### b) Cell production, recruitment, and activation rates

| Param           | Units                                  | Description                                      | Value             | Ref | Info |
|-----------------|----------------------------------------|--------------------------------------------------|-------------------|-----|------|
| $p_{M\Phi I,G}$ | 1/day                                  | Monocyte to macrophage differentiation by GM-CSF | 1.7               | 7   |      |
| $p_{M\Phi I,L}$ | 1/day                                  | Monocyte to macrophage differentiation by IL-6   | 1.7               | 7   |      |
| $a_{I,M\Phi}$   | ml/( $10^9$ cells) $\times$<br>(1/day) | Activation of macs by infected and dead cells    | $1.1 \times 10^3$ | 8,9 |      |

|                |       |                                                   |                      |    |   |
|----------------|-------|---------------------------------------------------|----------------------|----|---|
| $p_{M,I}$      | 1/day | Monocyte recruitment rate by infected cells       | 0.22                 | 10 |   |
| $p_{T,F}$      | 1/day | CD8 <sup>+</sup> T cell production rate by IFN    | 4                    | 11 |   |
| $p_{N,L}$      | 1/day | Neutrophils recruitment rate by IL-6              | 0.21                 |    | H |
| $p_{T,L}$      | 1/day | CD8 <sup>+</sup> T cells recruitment rate by IL-6 | 4                    | 11 |   |
| $p_{T,I}$      | 1/day | CD8 <sup>+</sup> T cell proliferation rate        | 1                    | 12 |   |
| $M_{prod}^*$   | 1/day | Homeostasis reservoir release rate                | 0.13                 |    | H |
| $\psi_M^{max}$ | 1/day | Maximal reservoir release rate                    | 11.55                | 13 |   |
| $N_{prod}^*$   | 1/day | Homeostasis reservoir release rate                | 0.21                 |    | H |
| $\psi_N^{max}$ | 1/day | Maximal reservoir release rate                    | 4.13                 | 14 |   |
| $C_{BF}^*$     | —     | Homeostasis neutrophil receptor bound fraction    | $1.6 \times 10^{-5}$ | 14 |   |

*c) Cell-related half-effect ( $\epsilon$ ), IC50 ( $IC_{50}$ ), and Hill coefficient ( $h$ ) parameters*

| Param                  | Units           | Description                                 | Value                 | Ref | Info             |
|------------------------|-----------------|---------------------------------------------|-----------------------|-----|------------------|
| $\epsilon_{F,I}$       | pg/ml           | IFN inhibition of viral production          | $4.7 \times 10^{-4}$  | 15  |                  |
| $\epsilon_{L,M\Phi}$   | pg/ml           | IL-6 monocytes to macrophages               | 0.011                 | 16  | Fig S1           |
| $\epsilon_{G,M\Phi I}$ | pg/ml           | GM-CSF monocyte to macrophages              | 0.027                 | 17  | Fig S1           |
| $\epsilon_{G,M}$       | pg/ml           | GM-CSF recruitment of monocytes             | 57.2                  | 18  | Fig S1           |
| $\epsilon_{F,T}$       | pg/ml           | IFN production of CD8 <sup>+</sup> T cells  | 0.004                 | 19  | Fig S1           |
| $\epsilon_{C,N}$       | unitless        | G-CSF recruitment of neutrophils            | $1.89 \times 10^{-4}$ | 14  |                  |
| $\epsilon_{L,N}$       | pg/ml           | IL-6 recruitment of neutrophils             | 57.2                  |     | $\epsilon_{G,M}$ |
| $\epsilon_{I,M}$       | $10^9$ cells/ml | Infected cell monocyte recruitment          | 0.11                  |     | E                |
| $\epsilon_{L,T}$       | pg/ml           | IL-6 production of CD8 <sup>+</sup> T cells | $3 \times 10^{-4}$    | 21  | Fig S1           |
| $\epsilon_{V,M\Phi}$   | log(cop/ml)     | Viral load for mac replenishing             | 2.96                  |     | Fig S3           |
| $\epsilon_{T,I}$       | $10^9$ cells/ml | Antigen driven proliferation                | $10^{-6}$             | 12  |                  |
| $h_M$                  | —               | GM-CSF monocyte recruitment                 | 1.67                  | 18  | Fig S1           |
| $h_{M,M\Phi}$          | —               | GM-CSF monocyte to macrophages              | 2.03                  | 17  | Fig S1           |
| $h_N$                  | —               | Neutrophil induced damage                   | 3.02                  | 22  | Fig S1           |
| $IC_{50,N}$            | $10^9$ cells/ml | Neutrophil induced damage                   | 0.047                 | 22  | Fig S1           |

*d) Cell/virus-induced death rates*

| Param              | Units                          | Description                                                      | Value | Ref   | Info   |
|--------------------|--------------------------------|------------------------------------------------------------------|-------|-------|--------|
| $\delta_{V,M\Phi}$ | ml/( $10^9$ cells)×<br>1/day   | Rate of viral clearance by macrophages                           | 768   | 23    | Fig S2 |
| $\delta_{V,N}$     | ml/( $10^9$ cells)×<br>1/day   | Rate of viral clearance by neutrophils                           | 2304  |       |        |
| $\delta_N$         | 1/day                          | Rate of neutrophil inflicted damage                              | 1.68  | 24    | Fig S2 |
| $\rho$             | —                              | Bystander death modulation constant                              | 0.5   |       | E      |
| $\delta_{I,M\Phi}$ | ml/( $10^9$ cells)×<br>(1/day) | Rate macrophages phagocytose infected cells                      | 121   | 25    |        |
| $\delta_{I,T}$     | ml/( $10^9$ cells)×<br>(1/day) | Rate CD8 <sup>+</sup> T cells induce apoptosis in infected cells | 238   | 26    |        |
| $\delta_{M\Phi,D}$ | ml/( $10^9$ cells)×<br>(1/day) | Rate macrophages die from phagocytosis                           | 6.06  | 27,28 |        |
| $\delta_{D,M\Phi}$ | ml/( $10^9$ cells)×<br>(1/day) | Rate macrophages phagocytose dead cells                          | 8.03  | 27    | Fig S2 |

e) Cell death and virus decay rates

| Param         | Units | Description                         | Value | Ref | Info  |
|---------------|-------|-------------------------------------|-------|-----|-------|
| $d_V$         | 1/day | Viral decay rate                    | 1.81  | 29  | Fig 2 |
| $d_D$         | 1/day | Degradation rate of apoptosed cells | 8     | 30  |       |
| $d_{M\Phi R}$ | 1/day | Alveolar macrophage death rate      | 0     | 31  |       |
| $d_{M\Phi I}$ | 1/day | Inflammatory macrophage death rate  | 0.3   | 32  |       |
| $d_M$         | 1/day | Monocyte death rate                 | 0.76  | 33  |       |
| $d_N$         | 1/day | Neutrophil death rate               | 1.28  | 34  |       |
| $d_T$         | 1/day | CD8 <sup>+</sup> T cell death rate  | 0.4   | 35  |       |

f) Cytokine production rates

| Param           | Units     | Description                                   | Value | Ref   | Info            |
|-----------------|-----------|-----------------------------------------------|-------|-------|-----------------|
| $p_{L,I}$       | pg/ml/day | IL-6 production by infected cells             | 11.89 | 36    | Fig S4          |
| $p_{L,M\Phi I}$ | pg/ml/day | IL-6 production by activated macrophages      | 1872  | 37    | Fig S4          |
| $p_{L,M}$       | pg/ml/day | IL-6 production by monocytes                  | 72.56 | 38    | Fig S1          |
| $p_{G,M\Phi I}$ | pg/ml/day | GM-CSF production by inflammatory macrophages | 2626  | 39    | $p_{G,M\Phi I}$ |
| $p_{C,M}$       | ng/ml/day | G-CSF production by monocytes                 | 26.26 |       |                 |
| $p_{G,M}$       | pg/ml/day | GM-CSF production by monocytes cells          | 3070  | 40    | Fig S3          |
| $p_{F,I}$       | pg/ml/day | IFN production by infected cells              | 2.82  | 41    | Fig S3          |
| $p_{F,M\Phi I}$ | pg/ml/day | IFN production by inflammatory macrophages    | 1.3   |       | E               |
| $p_{F,M}$       | pg/ml/day | IFN production by monocytes                   | 3.56  | 42,43 | Fig S3          |

g) Cytokine production half-effect ( $\eta$ ) and Hill coefficient ( $h$ ) parameters

| Param              | Units                    | Description                       | Value                | Ref   | Info             |
|--------------------|--------------------------|-----------------------------------|----------------------|-------|------------------|
| $\eta_{L,I}$       | 10 <sup>9</sup> cells/ml | IL-6 production by infected cells | 0.7                  | 36    | Fig S4           |
| $\eta_{L,M}$       | 10 <sup>9</sup> cells/ml | IL-6 by monocytes                 | 0.0045               | 38    | Fig S1           |
| $\eta_{L,M\Phi I}$ | 10 <sup>9</sup> cells/ml | IL-6 by inflammatory macrophages  | $3.6 \times 10^{-5}$ | 37    | Fig S4           |
| $\eta_{G,M\Phi}$   | 10 <sup>9</sup> cells/ml | GM-CSF by macrophages             | $3.6 \times 10^{-5}$ |       | $\eta_{L,M\Phi}$ |
| $\eta_{G,M}$       | 10 <sup>9</sup> cells/ml | GM-CSF by monocytes               | 0.15                 |       | H                |
| $\eta_{C,M}$       | 10 <sup>9</sup> cells/ml | G-CSF by monocytes                | 3.05                 |       | H                |
| $\eta_{F,I}$       | 10 <sup>9</sup> cells/ml | IFN by infected cells             | 0.011                | 41    | Fig S4           |
| $\eta_{F,M\Phi I}$ | 10 <sup>9</sup> cells/ml | IFN by inflammatory macrophages   | $1.3 \times 10^{-6}$ |       | H                |
| $\eta_{F,M}$       | 10 <sup>9</sup> cells/ml | IFN by monocytes                  | 0.54                 | 42,43 | Fig S3           |

h) Cytokine linear (renal) clearance and internalization rates

| Param      | Units | Description                    | Value | Ref | Info   |
|------------|-------|--------------------------------|-------|-----|--------|
| $k_{linL}$ | 1/day | Rate of IL-6 renal clearance   | 16.6  | 44  | Fig S2 |
| $k_{linG}$ | 1/day | Rate of GM-CSF renal clearance | 11.7  | 45  |        |
| $k_{linC}$ | 1/day | Rate of G-CSF renal clearance  | 0.16  | 14  |        |
| $k_{linF}$ | 1/day | Rate of IFN renal clearance    | 18    | 46  |        |
| $k_{intL}$ | 1/day | Internalization rate of IL-6   | 61.8  | 47  |        |
| $k_{intG}$ | 1/day | Internalization rate of GM-CSF | 73.4  | 48  |        |
| $k_{intC}$ | 1/day | Internalization rate of G-CSF  | 462   | 14  |        |
| $k_{intF}$ | 1/day | Internalization rate of IFN    | 17    | 49  |        |

i) Cytokine binding/unbinding rates and stoichiometric constant

| Param     | Units     | Description                                         | Value  | Ref | Info |
|-----------|-----------|-----------------------------------------------------|--------|-----|------|
| $k_{BL}$  | ml/pg/day | IL-6 binding rate                                   | 0.0018 | 50  |      |
| $k_{BG}$  | ml/pg/day | GM-CSF binding rate                                 | 0.0021 | 48  |      |
| $k_{BC}$  | ml/ng/day | G-CSF binding rate                                  | 2.24   | 14  |      |
| $k_{BF}$  | ml/pg/day | IFN binding rate                                    | 0.011  | 49  |      |
| $k_{UL}$  | 1/day     | IL-6 unbinding rate                                 | 22.3   | 50  |      |
| $k_{UG}$  | 1/day     | GM-CSF unbinding rate                               | 522    | 48  |      |
| $k_{UC}$  | 1/day     | G-CSF unbinding rate                                | 184    | 14  |      |
| $k_{UF}$  | 1/day     | IFN unbinding rate                                  | 6.07   | 49  |      |
| $POW$     | —         | Stoichiometric constant (G-CSF)                     | 1.4608 | 51  |      |
|           |           | Stoichiometric constant (IL-6, GM-CSF, IFN)         | 1      |     |      |
| $\hat{p}$ | —         | Stoichiometry relating constant (G-CSF)             | 2      | 51  |      |
|           |           | Stoichiometry relating constant (IL-6, GM-CSF, IFN) | 1      |     |      |

j) Number of cellular receptors and cytokine molecular weights

| Param     | Units      | Description                            | Value | Ref | Info |
|-----------|------------|----------------------------------------|-------|-----|------|
| $K_{L,N}$ | sites/cell | No. IL-6 receptors on neutrophils      | 720   | 52  |      |
| $K_{L,T}$ | sites/cell | No. IL-6 receptors on T cells          | 300   | 53  |      |
| $K_{L,M}$ | sites/cell | No. of IL-6 receptors on monocytes     | 509   | 54  |      |
| $K_{G,M}$ | sites/cell | No. GM-CSF receptors on monocyte       | 1058  | 55  |      |
| $K_{C,N}$ | sites/cell | No. of G-CSF receptors on neutrophil   | 600   | 56  |      |
| $K_{F,T}$ | sites/cell | No. of IFN receptors on T cells        | 1000  | 57  |      |
| $K_{F,I}$ | sites/cell | No. of IFN receptors on infected cells | 1300  | 58  |      |
| $MM_L$    | g/mol      | Molecular weight of IL-6               | 21000 | 59  |      |
| $MM_G$    | g/mol      | Molecular weight of GM-CSF             | 14000 | 60  |      |
| $MM_C$    | g/mol      | Molecular weight of G-CSF              | 19600 | 14  |      |
| $MM_F$    | g/mol      | Molecular weight of IFN- $\beta$       | 19000 | 61  |      |

k) Initial conditions

| Param          | Units                         | Description                      | Value                | Ref   | Info |
|----------------|-------------------------------|----------------------------------|----------------------|-------|------|
| $V_0$          | log <sub>10</sub> (copies/ml) | Initial viral load               | 12                   | 1     |      |
| $S_0$          | 10 <sup>9</sup> cells/ml      | Initial susceptible cells        | 0.16                 | 3,62  |      |
| $I_0$          | 10 <sup>9</sup> cells/ml      | Initial infected cells           | 0                    |       |      |
| $R_0$          | 10 <sup>9</sup> cells/ml      | Initial resistant cells          | 0                    |       |      |
| $M_{\Phi R,0}$ | 10 <sup>9</sup> cells/ml      | Initial resident macrophages     | $2.7 \times 10^{-5}$ | 3     |      |
| $M_{\Phi I,0}$ | 10 <sup>9</sup> cells/ml      | Initial inflammatory macrophages | $2.9 \times 10^{-7}$ | H     |      |
| $M_0$          | 10 <sup>9</sup> cells/ml      | Initial monocytes                | 0.0004               | 63    |      |
| $M_R$          | 10 <sup>9</sup> cells/ml      | Initial reservoir monocytes      | 0.0023               |       |      |
| $N_0$          | 10 <sup>9</sup> cells/ml      | Initial neutrophils              | 0.0053               | 14    |      |
| $N_R$          | 10 <sup>9</sup> cells/ml      | Initial reservoir neutrophils    | 0.0316               | 14    |      |
| $T_0$          | 10 <sup>9</sup> cells/ml      | Initial CD8 <sup>+</sup> T cells | $1.1 \times 10^{-4}$ | 64,65 |      |
| $L_{U,0}$      | pg/ml                         | Initial unbound IL-6             | 1.1                  | 66    |      |
| $L_{B,0}$      | pg/ml                         | Initial bound IL-6               | $1.4 \times 10^{-6}$ | H     |      |
| $G_{U,0}$      | pg/ml                         | Initial unbound GM-CSF           | 2.43                 | 67    |      |
| $G_{B,0}$      | pg/ml                         | Initial bound GM-CSF             | $1.6 \times 10^{-8}$ | H     |      |

|           |       |                       |                       |    |
|-----------|-------|-----------------------|-----------------------|----|
| $C_{U,0}$ | ng/ml | Initial unbound G-CSF | 0.025                 | 14 |
| $C_{B,0}$ | ng/ml | Initial bound G-CSF   | $6.5 \times 10^{-10}$ | 14 |
| $F_{U,0}$ | pg/ml | Initial unbound IFN   | 0.015                 | 68 |
| $F_{B,0}$ | pg/ml | Initial bound IFN     | $1.1 \times 10^{-8}$  | H  |

m) *List of variables in Eqs. S1-S22*

| Variable     | Units           | Description                              |
|--------------|-----------------|------------------------------------------|
| $V$          | cop/ml          | Viral load                               |
| $S$          | $10^9$ cells/ml | Susceptible cells                        |
| $I$          | $10^9$ cells/ml | Infected cells                           |
| $R$          | $10^9$ cells/ml | Resistant cells                          |
| $M_{\Phi R}$ | $10^9$ cells/ml | Alveolar (resident) macrophages          |
| $M_{\Phi I}$ | $10^9$ cells/ml | Inflammatory macrophages                 |
| $M$          | $10^9$ cells/ml | Monocytes                                |
| $M_R$        | $10^9$ cells/ml | Bone marrow reservoir monocytes          |
| $N$          | $10^9$ cells/ml | Neutrophils                              |
| $N_R$        | $10^9$ cells/ml | Bone marrow reservoir neutrophils        |
| $T$          | $10^9$ cells/ml | CD8 <sup>+</sup> T cells                 |
| $L_U$        | pg/ml           | Unbound IL-6                             |
| $L_B$        | pg/ml           | Bound IL-6                               |
| $G_U$        | pg/ml           | Unbound GM-CSF                           |
| $G_B$        | pg/ml           | Bound GM-CSF                             |
| $C_U$        | ng/ml           | Unbound G-CSF                            |
| $C_B$        | ng/ml           | Bound G-CSF                              |
| $C_{BF}$     | unitless        | Neutrophil G-CSF receptor bound fraction |
| $F_U$        | pg/ml           | Unbound IFN                              |
| $F_B$        | pg/ml           | Bound IFN                                |

### S3. Parameters taken from literature

#### S3.1. Initial cytokine concentrations

The basal concentrations of unbound cytokines were taken from values in the literature. The plasma concentration of colony stimulating factor GM-CSF in healthy adults was measured by Lee et al.<sup>67</sup> to be  $2.43 \pm 0.42$  pg/ml (i.e.,  $G_{U,0} = 2.43$  pg/ml). We fixed the initial unbound G-CSF cytokine concentration to  $C_{U,0} = 0.025$  ng/ml<sup>14</sup>. The concentration of unbound IFN type 1 was set to be  $F_{U,0} = 0.015$  pg/ml based on the average value of IFN- $\alpha$  in humans<sup>69,70</sup>. The median plasma IL-6 concentration was estimated to be  $L_{U,0} = 1.1$  pg/ml in blood samples from healthy adults<sup>71</sup>.

#### S3.2. Initial cell populations

The average total number of type I and type II alveolar epithelial cells and endothelial cells in the lung was estimated by Crapo et al.<sup>3</sup> to be  $136 \times 10^9$  cells from eight people (6 males, 2 females) aged 19-40,. At functional residual capacity, pulmonary total tissue volume was reported by Armstrong et al.<sup>62</sup> to be  $843 \pm 110$  ml. Together, this gave an initial target cell concentration of  $S_0 = 0.16 \times 10^9$  cells/ml. Similarly, Crapo et al.<sup>3</sup> found the average number of alveolar macrophages to be  $23 \pm 7 \times 10^6$  cells, thus  $M_{\Phi R,0} = 2.73 \times 10^5$  cells/ml. Monocytes account for 1% to 10% of circulating white blood cells, which equates to 200 to 600 monocytes per microliter of blood<sup>63</sup> (with a blood volume of 5 litres<sup>72</sup>). Therefore, we assumed that at homeostasis  $M_0 = 4 \times 10^5$  cells/ml. For the total number of neutrophils in the blood, we used the previous estimate of Craig et al.<sup>51</sup>  $N_0 = 5.26 \times 10^6$  cells/ml that was calculated from whole blood and

marginated neutrophils. Lastly, the number of CD8<sup>+</sup> T cells in the lung tissue was, on average, 20% of the number of CD8<sup>+</sup> T cells in the blood<sup>65</sup>. Using flow cytometry, Uppal et al.<sup>64</sup> determined there were 552 cells/ $\mu$ l, on average, in the blood. To account for the number of naïve CD8<sup>+</sup> T cells infiltrating the lungs<sup>73</sup>, the initial number of CD8<sup>+</sup> T cells was estimated from the proportion of T cells in the tissue, i.e.  $T_0 = 1.1 \times 10^5$  cells/ml.

### ***S3.3. Cytokine molecular weights and receptors per cell***

Cytokine binding and unbinding kinetics were modelled using the molecular weight of each cytokine and the number of corresponding receptors on the binding cell. The molecular weight for IL-6 is  $MM_L = 21,000$  g/mol<sup>59</sup>; for GM-CSF is  $MM_G = 14,000$  g/mol<sup>60</sup>; for G-CSF is  $MM_C = 19,600$  g/mol<sup>51</sup>; and for IFN- $\beta$  is  $MM_F = 19,000$  g/mol<sup>61</sup>. The number of high-affinity receptors for GM-CSF on the surface of blood monocytes<sup>55</sup> is  $K_{G,M} = 1,058$  sites/cell. Mature human neutrophils express  $\sim 200$ -1,000 G-CSF receptors per cell<sup>56</sup>, thus we fixed  $K_{C,N} = 600$  sites/cell. Most cells have 1,000-2,000 type I IFN receptors (IFNAR) receptors<sup>57</sup>. Assuming CD8<sup>+</sup> T cells are at the lower end of this interval gives  $K_{F,T} = 1,000$  sites/cell. The number of IFNAR sites on HEC1B human (uterus/endometrium epithelial) cells is on average  $K_{F,I} = 1,300$  sites/cell<sup>58</sup>. The number of IL-6 receptors on CD8<sup>+</sup> T cells is  $K_{L,T} = 300$  sites/cell based on measurements from Taga et al.<sup>53</sup>. We fixed the number of IL-6 receptors on neutrophils and monocytes to  $K_{L,N} = 720$  sites/cell and  $K_{L,M} = 509$  sites/cell respectively, based on the range in IL-6 receptors expressed on myeloma hematopoietic cells<sup>52</sup> and IL-6 receptors on mouse myelomonocytic leukemic M1 cells<sup>54</sup>.

### ***S3.4. Binding/unbinding rates of cytokines***

Based on measurements by Tenhumberg et al.<sup>50</sup>, the binding and unbinding rate of IL-6 was set to be  $k_{B_L} = 0.0018$  pg/ml/day and  $k_{U_L} = 22.29$ /day, respectively. The unbinding kinetics for G-CSF were previously estimated by Craig et al.<sup>51</sup> to be  $k_{U_C} = 184.87$ /day. Lastly, the unbinding and binding rates for GM-CSF were taken from previous modelling work<sup>48</sup> and set to  $k_{U_G} = 522.72$ /day and  $k_{B_G} = 0.0021$  per pg/ml/day respectively. Mager and Jusko<sup>49</sup> estimated the binding rate of IFN- $\beta$  using a PKPD model to be  $k_{B_F} = 0.0107$  per pg/ml/day. Lastly, the binding rate for GM-CSF was fixed as  $k_{B_G} = 0.0021$  per pg/ml/day<sup>48</sup>.

### ***S3.5. Clearance and internalization rate of cytokines***

Most of the clearance and internalization rates of cytokines in **Eqs. S1-S22** were obtained by assuming exponential clearance and using the half-life formula:

$$k_{lin} = \frac{\ln(2)}{t_{1/2}}, \quad S23$$

where  $t_{1/2}$  is the cytokine half-life and  $k_{lin}$  the clearance rate. IL-6 has a short half-life of approximately 1 hour<sup>44</sup> giving a clearance rate of  $k_{lin_L} = 16.6$ /day. The half-life of GM-CSF ranges between 50-85 minutes<sup>45</sup>. We took the upper value giving  $k_{lin_G} = 11.74$ /day. The linear clearance rate of G-CSF was previously estimated by Craig et al.<sup>51</sup> as  $k_{lin_C} = 0.16$ /day. Half-lives for IFN- $\beta$  range from 1-2 hours<sup>46</sup>. Using the lower bound, we fixed the clearance rate as  $k_{lin_F} = 16.6$ /day, giving a half-life of roughly 55 minutes. The internalization rates of GM-CSF and G-CSF were taken from previous pharmacokinetic modelling<sup>48,51</sup> and fixed to  $k_{int_G} = 73.4$ /day and  $k_{int_C} = 462$ /day. Similarly, the internalization rate of IFN was fixed as  $k_{int_F} = 16.97$ /day based on previous modelling of the receptor-mediated dynamics of IFN- $\beta$ <sup>46,74</sup>. The internalization rate of IL-6,  $k_{lin_L}$ , was estimated by data fitting (Section S4.2.2).



### ***S3.6. Neutrophil and monocyte reservoir dynamics***

Craig et al.<sup>51</sup> previously developed a physiological model of the production dynamics of neutrophils through G-CSF regulation that accounts for the concentration of freely circulating cytokine and cytokine bound to mature neutrophils. The parameters in our model that relate to the number of neutrophils in the bone marrow reservoir, release rate, and the dynamics of G-CSF on neutrophils (**Eq. 5** & **Eq. S9**) were taken from their work, i.e.  $N_R = 3.16 \times 10^7$  cells/ml,  $C_{BF}^* = 1.58 \times 10^{-5}$  (unitless),  $\epsilon_{C,N} = 1.8924 \times 10^{-4}$  (unitless), and  $\psi_N^{max} = 4.13/\text{day}$ . Similarly, the bone marrow monocyte reservoir dynamics were estimated based on previous modelling work by Cassidy et al.<sup>13</sup> to be  $M_R = 2.27 \times 10^6$  cells/ml and  $\psi_M^{max} = 11.55/\text{day}$ .

### ***S3.7. Monocyte, macrophage differentiation and activation rates***

Previous mathematical modelling studies were used to estimate the monocyte and macrophage differentiation and activation rates. We assumed that the recruitment rate of monocytes would be equal to the recruitment rate of new macrophages by infected cells<sup>10</sup>, giving  $p_{M,I} = 0.22/\text{day}$ . We approximated the activation rate of resident macrophages to inflammatory macrophages from the rate of dendritic cell activation<sup>8,9</sup>, giving  $a_{I,M\Phi} = 1.1 \times 10^3$  per  $10^9$  cells/ml/day. Lastly, the GM-CSF and IL-6 stimulated differentiation rate of monocytes to macrophages was  $p_{M\Phi,I,G} = 1.7/\text{day}$  based on the estimates that it can take 12-14 hours for monocytes to migrate from the bone marrow to the site of inflammation and subsequently differentiate into progenitor cells<sup>7</sup>.

### ***S3.8. CD8<sup>+</sup> T cell recruitment and expansion rate***

The maximal time for CD8<sup>+</sup> T cell division is between 4-6 hours<sup>11</sup>, giving a production rate of  $p_{T,F} = 4/\text{day}$ . The dynamics of CD8<sup>+</sup> T cells in response to infected cells were modelled similarly to previous work by de Pillis et al.<sup>75</sup> and Baral et al.<sup>12</sup>, and we set the activation rate and half-effect parameter of infected cells from these studies, i.e.  $p_{T,I} = 9 \times 10^{-3}/\text{day}$  and  $\epsilon_{T,I} = 10^3$  cells/ml. Lastly,  $\tau_T = 4.5$  days based on the delay in infected cell recruitment of CD8<sup>+</sup> T cells<sup>6</sup>.

### ***S3.9. Cell death rates***

Neutrophils are known to have a short half-life in circulation<sup>34</sup> of  $d_N = 1.28/\text{day}$ . Kim et al.<sup>35</sup> estimated that primed CD8<sup>+</sup> T cells have a death rate of  $d_T = 0.4/\text{day}$ . Monocytes transiting from the bone marrow to the blood have a circulating half-life of 22 hours<sup>33</sup>, using the half-life formula (**Eq. S23**) this gives  $d_M = 0.756/\text{day}$ . The time from initiation of cell apoptosis to completion can occur as quickly as 2-3 hours<sup>30</sup> giving a dead cell decay rate of  $d_D = 8/\text{day}$ . At homeostasis, mature macrophages are a quiescent population with a half-life between 4-6 weeks<sup>31</sup>, or sometimes greater than 80 days<sup>76</sup>. Thus, we assumed that the death of resident alveolar macrophages is negligible ( $d_{M\Phi R} = 0/\text{day}$ ) given the time frame of acute SARS-CoV-2 infections considered in this study (3 weeks). Inflammatory macrophages were assumed to have a death rate of  $d_{M\Phi I} = 0.3/\text{day}$ , which was estimated through inflammatory macrophages in response to oncolytic virotherapy<sup>32</sup>. Macrophages also undergo apoptosis from phagocytosing too much material (exhaustion). We assumed it takes ~20 dead cells to be phagocytosed to induce macrophage death<sup>27,28</sup> and set  $\delta_{M\Phi,D} = 6.06$  per  $10^9$  cells/day. The rate of CD8<sup>+</sup> T cell-induced apoptosis of infected cells was previously estimated by Lee et al.<sup>26</sup> giving  $\delta_{I,T} = 238$  per  $10^9$  cells/day. The phagocytosis rate of infected cells by macrophages  $\delta_{I,M\Phi} = 121.195$  per  $10^9$  cells/day was estimated from neutrophil phagocytosis<sup>25</sup>.

## S4. Parameters estimated by data fitting

### S4.1. Pharmacodynamics of stimulatory and inhibitory effects for cells and cytokines

We used standard pharmacodynamic relationships to model the various immunological effects of cells and cytokines. Here, the half-maximal response (generally expressed as an  $EC_{50}$  or  $IC_{50}$ ) of the cytokine or cell population is the concentration at which half of the maximal (stimulatory or inhibitory) effect is achieved<sup>77</sup>. Effect curves,  $E$ , (stimulatory or inhibitory respectively) are given by<sup>78</sup>

$$E = E_0 + E_{max} \frac{W^h}{W^h + EC_{50}^h}, \quad S24$$

$$E = E_0 + E_{max} \left( 1 - \frac{W^h}{W^h + IC_{50}^h} \right), \quad S25$$

where  $E$  denotes the measured response (e.g., cell viability),  $W$  is the concentration of cytokine or cells under consideration,  $E_0$  is the basal effect (the response when the dose of the compound is zero),  $E_{max}$  is the maximum effect (stimulatory or inhibitory) of the compound,  $h > 0$  is the Hill coefficient that measures the sensitivity of the response to the dose range of the compound (i.e. the slope of the dose-response curve). **Eqs. S24-S25** are also known as  $E_{max}$  and  $I_{max}$  functions<sup>77</sup>, see also **Eq. 1 Main Text**.

#### S4.1.1. Type I IFN inhibition of viral infection and replication

Sheahan et al.<sup>15</sup> measured the mean inhibition of MERS-CoV replication of IFN- $\beta$  and found the  $EC_{50}$  to be 175 IU/ml. The specific activity of recombinant human IFN- $\beta$  is approximately  $2.8 \times 10^8$  IU/mg<sup>15</sup>. We converted the  $EC_{50}$  of 175 IU/ml to pg/ml to give the half-effect of IFN- $\beta$  on viral production and infection capacity as  $\epsilon_{F,I} = 625$  pg/ml<sup>15</sup>. Since this is a measurement of unbound IFN, we scaled this by the initial proportion of bound to unbound IFN ( $F_{B,0}/F_{U,0}$ ) to get  $\epsilon_{F,I} = 4.65 \times 10^{-4}$  pg/ml.

#### S4.1.2. Neutrophil-induced damage of alveolar epithelial cells

To estimate the rate of neutrophil induced damage due to the release of reactive oxygen species (ROS) (**Eqs. S2-S4**), we used cell viability measurements of rat alveolar epithelial cells (RLE) after incubation for 2 hours with hydrogen peroxide ( $H_2O_2$ ) at varying concentrations<sup>22</sup>. Fitting **Eq. S25** to this data, we obtained  $IC_{50} = 197.63\mu M$  and  $h = 3.02$  (**Figure S1A**). To convert this  $IC_{50}$  from a concentration of  $H_2O_2$  to the concentration of neutrophils (as in **Eqs. S2-S4**), we used the approximate amount of  $H_2O_2$  produced by a single neutrophil in response to stimulation by *N*-Formylmethionyl-leucyl-phenylalanine and phorbol myristate acetate<sup>79</sup>. Taking the average response from these stimuli and converting to units  $\mu M$ /cell, neutrophils produce  $0.0042\mu M$ /cell of  $H_2O_2$ . As the maximum production of  $H_2O_2$  by neutrophils is achieved relatively fast (15-30 minutes after stimulation<sup>79</sup>) we estimated the equivalent  $IC_{50}$  as a neutrophil concentration to be  $4.71 \times 10^4$  cells (i.e.  $197.62/0.0042$ ). As this represents a concentration of stimulated neutrophils we then increased this by the number of neutrophils at homeostasis<sup>80</sup> to give the half-effect concentration for neutrophil bystander damage of  $IC_{50,N} = 4.71 \times 10^7$  cells/ml. This estimate was in line with estimates obtained from similar experiments conducted by Weiss et al<sup>81</sup> and Snyers et al.<sup>52</sup>.

#### S4.1.3. Effect of GM-CSF on monocyte production and differentiation

GM-CSF can act in a paracrine fashion to recruit circulating monocytes, enhance their functions in host defense<sup>82,83</sup> and influence their differentiation into monocytic or granulocytic lineages<sup>17</sup>. Reducing **Eqs. S8** to consider only the effect of production and differentiation gives

$$\frac{dM}{dt} = \frac{p_{M,G} G_B^{h_M}}{G_B^{h_M} + \epsilon_{G,M}^{h_M}} - \frac{p_{M,\Phi I,G} G_B^{h_{M,M\Phi}} M}{G_B^{h_{M,M\Phi}} + \epsilon_{G,M\Phi I}^{h_{M,M\Phi}}}. \quad S26$$

We modelled the effect of GM-CSF on monocyte production by estimating its potency from the dose-response of cultured blood monoculture cells with various concentrations of murine recombinant GM-CSF for 21 days<sup>18</sup>. Fitting **Eq. S24** gave  $EC_{50} = 85.8$  IU/ml and  $h = 1.67$  (**Figure S1B**). Using the specific activity of recombinant GM-CSF (i.e.  $15 \times 10^5$  IU/ $\mu$ g<sup>18</sup>), this becomes  $\epsilon_{G,M} = 57.2$  pg/ml. GM-CSF also promotes myeloid differentiation of cultured bone marrow cells into granulocytic and monocytic lineages towards terminal differentiation into monocytes, macrophages, and dendritic cells<sup>17</sup>. Sun et al.<sup>17</sup> investigated whether the dose of GM-CSF regulates the development of myeloid cells and measured the monocytic myeloid cell count as a function of GM-CSF concentrations. Fitting **Eq. S24** to this data, we obtained  $EC_{50} = 2.66$  ng/ml and  $h = 2.03$  (**Figure S1C**). Converting this to the units of GM-CSF in our model gives  $2.7 \times 10^3$  pg/ml as the unbound GM-CSF half-effect concentration, which scaled by  $10^{-5}$  (the order of initial bound GM-CSF to initial monocytes  $G_{B,0}/M_0$ ) gives a bound GM-CSF half effect concentration of  $\epsilon_{G,M\Phi} = 0.027$  pg/ml.

#### S4.1.1. *IL-6 production by monocytes and effect on monocyte differentiation*

Peripheral blood monocytes can be induced to secrete an array of cytokines, including IL-6, by stimuli such as lipopolysaccharide (LPS)<sup>38</sup>. The production of unbound IL-6 was modelled as a function of the monocyte concentration (**Eq. S11**):

$$\frac{dL_U}{dt} = \frac{p_{L,M} M}{M + \eta_{L,M}}. \quad S27$$

Alderson et al.<sup>38</sup> measured the concentration of IL-6 (IU/ml) produced by monocytes stimulated with 10 $\mu$ l of LPS over 24 hours in 1ml of culture medium (**Figure S1D**). We fit **Eq. S27** to this data by assuming the number of monocytes was fixed to  $M = 2 \times 10^5$  cells and that there was no monocyte proliferation over the course of the experiment. This gave an estimate of  $p_{L,M} = 7.26 \times 10^4$  pg/ml/day (converted using 4.5 pg/ml as the concentration required for half-maximal stimulation of B9 proliferation by IL-6<sup>84</sup>) and  $\eta_{L,M} = 9 \times 10^4$  cells. Scaling this half-effect by the initial concentration of monocytes gives  $\eta_{L,M} = 4.98 \times 10^7$  cells/ml. We then scaled the production rate of IL-6 by  $10^3$  as the maximum IL-6 concentration achieved *in vivo* during SARS-CoV-2 infection was  $10^3$  less than that in the two *in vitro* experiments. We confirmed this production rate using the experiments of Morris et al.<sup>85</sup>, which measure the production of IL-6 by blood mononuclear cells by co-culturing with airway smooth muscle cells (ASM) cells and LPS stimulation.

Production of macrophages by monocytes from stimulation with IL-6 was modelled as

$$\frac{dM}{dt} = \frac{p_{M,\Phi I,L} L_B M}{L_B + \epsilon_{L,M\Phi}}, \quad S28$$

$$\frac{dM_{\Phi I}}{dt} = \frac{p_{M,\Phi I,L} L_B M}{L_B + \epsilon_{L,M\Phi}}, \quad S29$$

where  $p_{M,\Phi I,L}$  is the production rate and  $\epsilon_{L,M\Phi}$  is the half effect from the bound IL-6 (**Eqs. S7-S8**). To estimate the production of macrophages based on the concentration of IL-6, we used measurements for the production of macrophages by fibroblasts. Fibroblasts release IL-6, which then up-regulates the expression of functional M-CSF receptors on monocytes<sup>16</sup> and allows monocytes to consume autocrine M-CSF and thus switch differentiation to macrophages rather than DCs. Chomarat et al.<sup>16</sup> cultured monocytes in GM-CSF and IL-4 with graded numbers of normal skin fibroblasts. At day 5, cells were analyzed for macrophage

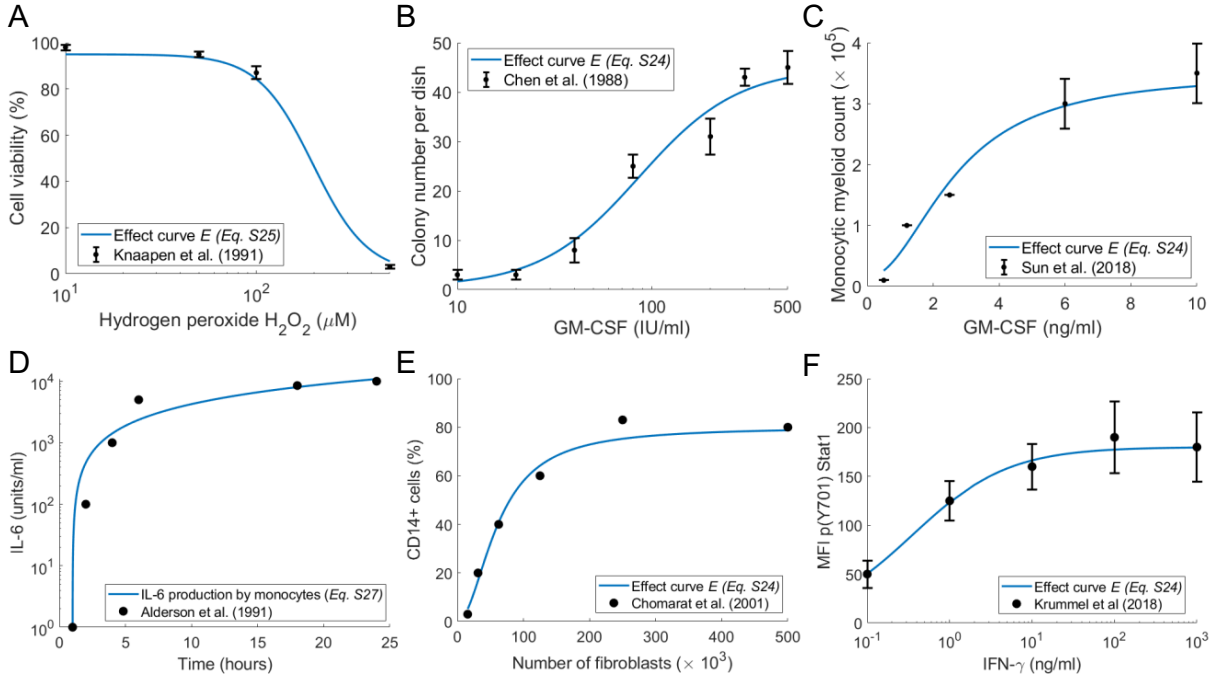

**Figure S1. Effects of neutrophils on lung epithelial cells, GM-CSF on monocyte production and differentiation, the relationships between monocytes and CD4<sup>+</sup> T cells with IL-6, and the influence of IFN on T cell expansion.** **A)** Using the measurements by Knaapen et al.<sup>22</sup>, the inhibitory effect curve E (Eq. S25) was fit to the cell viability of RLE cells under various concentrations of H<sub>2</sub>O<sub>2</sub>. **B)** The stimulatory effect curve E (Eq. S24) was fit to the dose response measurements of blood monoculture cells ( $3 \times 10^3$  cells/dish) with various concentrations of murine recombinant GM-CSF (IU/ml)<sup>18</sup>. **C)** The stimulatory effect curve E (Eq. S24) was fit to measurements for the monocytic myeloid cell count as a function of GM-CSF.<sup>17</sup> **D)** Eq. S27 fit to time course data of IL-6 production from monocytes<sup>38</sup>. **E)** IL-6 stimulation of monocyte differentiation to macrophages modelled by the inhibitory effect curve E (Eq. S24) fit to the percentage of CD14<sup>+</sup> cells (macrophages) as a function of the number of fibroblasts measured by Chomarat et al.<sup>16</sup>. **F)** Stimulatory effect curve E (Eq. S24) for IFN- $\gamma$  stimulation on CD8<sup>+</sup> T cells fit to measurements of the signalling in CD8<sup>+</sup> T cells for varying doses of IFN- $\gamma$ <sup>19</sup>. Data (black) is plotted as either circles (D & E) or mean and standard deviation error bars (A-C&F); solid blue line: corresponding fit.

markers CD1a and CD14. Fitting Eq. S24 to these results gave an  $EC_{50} = 61.6$  cells and  $h = 1.96$  (Figure S1E). Using then concentration of IL-6 produced by 250,000 fibroblasts (4.5pg/ml) and assuming that there is a linear relationship between the number of fibroblasts and the concentration of IL-6, we converted this to an unbound IL-6 concentration, i.e.  $EC_{50} = 1.1 \times 10^3$  pg/ml. Scaling this by  $10^{-5}$  (the order of initial bound to unbound IL-6 in the model) gives the bound IL-6 concentration  $\epsilon_{L,M\Phi} = 0.011$  pg/ml.

#### S4.1.1. Effect of IFN on CD8<sup>+</sup> T cells

To estimate the half-effect IFN concentration for CD8<sup>+</sup> T cell regulation,  $\epsilon_{F,T}$ , we used dose-response measurements for CD8<sup>+</sup> T regulation by IFN- $\gamma$ . IFN- $\gamma$  is known to regulate CD8<sup>+</sup> T cell differentiation through co-stimulation of the signal transducer and activator of transcription 1 (STAT1) pathway<sup>19</sup>. Krummel et al.<sup>19</sup> measured the effect on IFN- $\gamma$  signaling in CD8<sup>+</sup> T cells by analysing the p(Y701) STAT1 as a function of increasing concentrations. Fitting Eq. S24 to this data for  $EC_{50}$  and  $h$  resulting in a  $h$  value of approximately 1, so we fixed  $h = 1$  to improve identifiability and fit  $EC_{50}$  which gave  $EC_{50} = 0.4$  ng/ml. Assuming the half-effect concentration for IFN- $\gamma$  regulation of the STAT1 pathway can be used to estimate the half-effect concentration of IFN gives  $\epsilon_{F,T} = 0.004$  pg/ml (scaled by  $10^{-5}$  to obtain the unbound concentration; Figure S1F).

#### S4.1.1. *Effect of IL-6 on CD4<sup>+</sup> T cell expansion*

IL-6 stimulates IL-2 production and the proliferation of CD8<sup>+</sup> and CD4<sup>+</sup> T cells<sup>21</sup>. Holsti and Raulet<sup>21</sup> measured the counts per minute (CPM) of CD4<sup>+</sup> cell proliferation from IL-6 and IL-1 induction. Converting their data from sample dilution to  $\mu\text{g/ml}$  and fitting **Eq. S24** gave  $h = 2$  and  $EC_{50} = 2.26 \times 10^{-4}$  (reciprocal dilution of IL-6) (**Figure S2A**). In Holsti and Raulet, the medium contained 2.1  $\mu\text{g/ml}$  of IL-6. Converting the dilution to a concentration in our units and scaling this by  $10^{-5}$  (the order of initial bound IL-6 to unbound IL-6) gives  $\epsilon_{L,T} = 4.7 \times 10^{-3}$  pg/ml.

### S4.2. *Estimating parameters from temporal data*

#### S4.2.1. *Proliferation rate of epithelial cells*

We used measurements of A549 cell proliferation<sup>2</sup> to fit an exponential growth curve and determined the proliferation rate of epithelial cells to be  $\lambda_S = 0.744/\text{day}$  (**Figure S2B**).

#### S4.2.2. *IL-6 internalization rate*

Bound IL-6 is internalized at a rate  $k_{int_L} L_B$  (**Eq. S12**), which gives the fraction of internalized IL-6

$$f(t) = 1 - e^{-k_{int_L} t}. \quad S30$$

Fitting  $k_{int_L}$  to experiments measuring the fraction of IL-6 internalized by hepatocytes over 30 minutes<sup>47</sup> gave  $k_{int_L} = 61.8/\text{day}$  (**Figure S2C**).

#### S4.2.3. *Neutrophil-induced cell death rate*

To estimate the rate of epithelial cell death induced by the release of  $\text{H}_2\text{O}_2$  by neutrophils ( $\delta_N$ ), we used measurements of the total alveolar macrophages apoptosis after  $\text{H}_2\text{O}_2$  exposure from 0-12 hours<sup>24</sup> and fit an exponential decay rate, which gave  $\delta_N = 1.68/\text{day}$  (**Figure S2D**).

#### S4.2.4. *Rate of phagocytosis of dead cells by macrophages*

The rate macrophages phagocytose dead material is described by

$$\frac{dM_{\Phi E}}{dt} = -d_{D,M\Phi} D M_{\Phi E}, \quad S31$$

$$\frac{dM_{\Phi F}}{dt} = d_{D,M\Phi} D M_{\Phi E}, \quad S32$$

$$\frac{dD}{dt} = -d_{D,M\Phi} D (M_{\Phi E} - M_{\Phi F}), \quad S33$$

where empty macrophages ( $M_{\Phi E}$ ) phagocytose dead cells ( $D$ ) at a rate  $d_{D,M\Phi}$  and become loaded macrophages ( $M_{\Phi F}$ ). Loaded macrophages also phagocytose dead cells at a rate  $d_{D,M\Phi}$ . Assuming the initial concentration of macrophages and dead cells is  $M_{\Phi E}(0) = 36 \times 10^7$  cells/ml,  $M_{\Phi F}(0) = 0$  cells/ml, and  $D(0) = 5 \times 36 \times 10^7$  cells/ml (based on our full model's initial conditions and the experiment where the percentage of macrophages that had engulfed material over 25 hours was measured<sup>27</sup>), we fit the rate macrophages phagocytose dead material over 25 hours and obtained  $d_{D,M\Phi} = 8.03$  per cell/day (**Figure S2E**).

#### S4.2.1. *Clearance of extracellular virus by macrophages*

To determine the clearance rate of extracellular virus by macrophages,  $\delta_{V,M\Phi}$ , we used measurements of foot-and-mouth disease virus (FMDV) uptake in macrophages over 2 hours *in vitro*<sup>23</sup> with the simple model

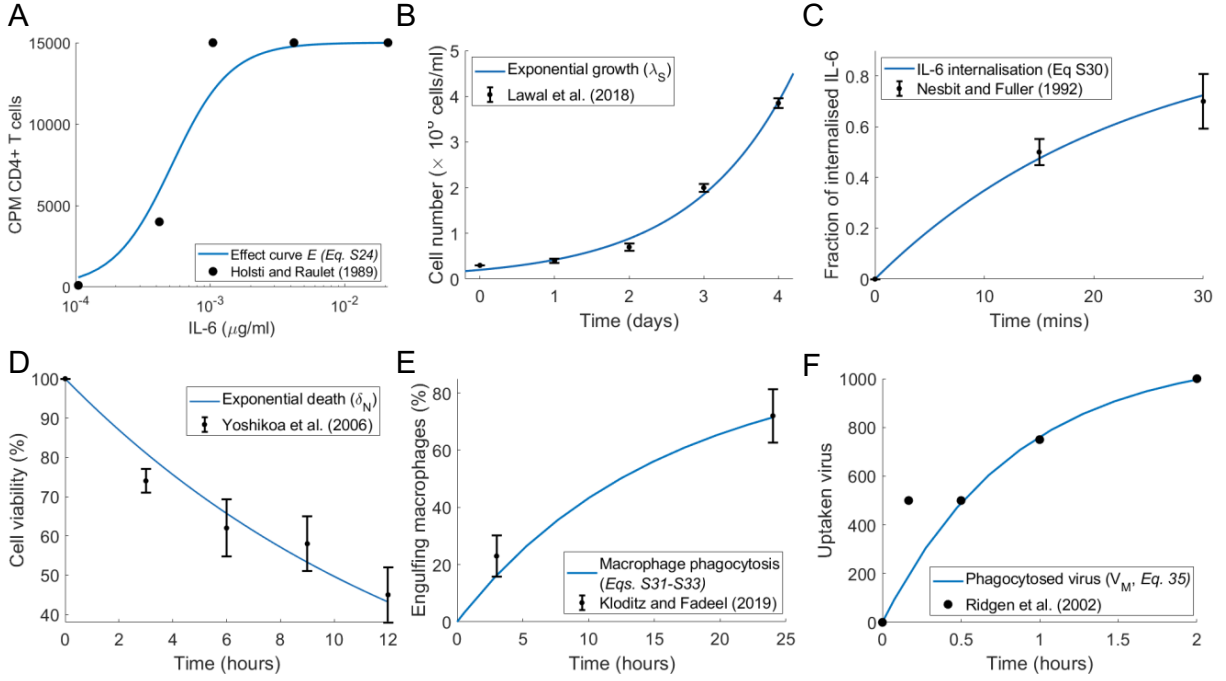

**Figure S2. Dynamics of IL-6 on T cell expansion, epithelial cell growth, IL-6 internalization, neutrophil-induced damage, and macrophage phagocytosis.** **A)** Effect curve (Eq. S24) for the IL-6 effect on T cell expansion fit to measurements CD4<sup>+</sup> T cells from dilutions of IL-6 by Holsti and Raulet<sup>21</sup>. **B)** Exponential growth curve fit to the growth of A549 cells<sup>2</sup> **C)** The internalization rate of IL-6 (Eq. S30) fit to the fraction of internalized IL-6<sup>47</sup>. **D)** Exponential decay fit to cell viability after H<sub>2</sub>O<sub>2</sub> administration<sup>24</sup>. **E)** The macrophage clearance of apoptotic material (Eqs. S31-S33) was fit to the percentage of macrophages that had engulfed material over 25 hours<sup>27</sup>. **F)** The phagocytosis rate of extracellular virus by macrophages was obtained by fitting Eqs. S34-S35 to the uptake of virus by macrophages measured by Ridgen et al.<sup>23</sup>. Data (black) is plotted as either circles (A & F) or mean and standard deviation error bars (B-E); solid blue line: corresponding fit.

$$\frac{dV}{dt} = -\delta_{V,M\Phi} V M_{\Phi I}, \quad \text{S34}$$

$$\frac{dV_M}{dt} = \delta_{V,M\Phi} V M_{\Phi I}, \quad \text{S35}$$

where  $V$  is free virus, and  $V_M$  is the amount of phagocytosed virus. Considering  $M_{\Phi I} = 36 \times 10^7$  cells/ml (i.e. our initial measurements in the lung) was constant gave an estimate of  $\delta_{V,M\Phi} = 768/\text{day}$  (Figure S2F).

#### S4.2.1. Production of type I IFN by monocytes

We modelled the production of type I IFN by monocytes (Eq. S17) by

$$\frac{dF_U}{dt} = \frac{p_{F,M} M}{M + \eta_{F,M}}. \quad \text{S36}$$

To fit the production of IFN from monocytes, we considered a simple production function for monocytes in the absence of any cytokine or inflammatory signalling

$$\frac{dM}{dt} = \frac{p_{\hat{M}} M^h}{M^h + EC_{50,\hat{M}}^h} \left(1 - \frac{M}{\hat{M}_{max}}\right), \quad \text{S37}$$

where  $p_{\hat{M}}$  is the rate of monocyte production per day,  $EC_{50,\hat{M}}$  is the production half-effect,  $h$  is the Hill coefficient, and  $\hat{M}_{max}$  is the carrying capacity of the monocyte population. Ohta et al.<sup>42</sup> measured the

number of monocytes after incubation for 12 days with 0.1 nM of calcitriol. Fitting **Eq. S37** to their data, we obtained  $EC_{50,\widehat{M}} = 5.4 \times 10^4$  cells,  $h = 13.8$ , and  $\hat{p} = 9.4 \times 10^4$  cells/day (**Figure S3A**).

Krilov et al.<sup>43</sup> measured IFN- $\alpha$  production from monocytes that had been cultured for either 1, 2, 4 or 7 days before the introduction of respiratory syncytial virus (RSV). IFN- $\alpha$  was measured 24 hours after RSV was introduced at  $t_{RSV}$ . Combining **Eqs. S36-S37**, gives the production of IFN ( $F_U$ ) from RSV stimulation of monocytes

$$\frac{d\widehat{M}}{dt} = \frac{p\widehat{M}^h}{M^h + EC_{50,\widehat{M}}^h} \left(1 - \frac{\widehat{M}}{M_{max}}\right), \quad S38$$

$$\frac{dF_U}{dt} = \frac{p_{F,M}M^h}{M^h + \eta_{F,M}^h} H(t - t_{RSV}), \quad S39$$

assuming IFN production occurs only after RVS introduction at  $t_{RSV}=1, 2, 4,$  or 7 days (modelled using the Heaviside function). Fixing  $\eta_{F,M} = EC_{50,\widehat{M}} = 0.54$  pg/ml, and setting the production rate of monocytes to be equivalent to Ohta's experiments (**Figure S3A**), we fit the concentration of IFN 24 hours after RSV is introduced ( $F_U(t_{RSV} + 24)$ ) and obtained  $p_{F,M} = 997.1978$  IU/ml/day (**Figure S3B**). Converting the production rate using IFN's specific activity of 0.028 IU/pg gives  $p_{F,M} = 3.561$  pg/ml/day

#### S4.2.1. *Resident macrophage production rate during declining infection*

Tissue-resident (or alveolar) macrophages return to homeostasis after viral infections have been successfully cleared<sup>86</sup>, which we accounted for using logistic production (**Eqs. S6-S7**):

$$\frac{dV}{dt} = -d_V V, \quad S40$$

$$\frac{dM_{\Phi R}}{dt} = \frac{\lambda_{M\Phi} M_{\Phi I}}{V + \epsilon_{V,M\Phi}} \left(1 - \frac{M_{\Phi R}}{M_{\Phi max}}\right), \quad S41$$

$$\frac{dM_{\Phi I}}{dt} = -d_{M\Phi} M_{\Phi I} - \frac{\lambda_{M\Phi} M_{\Phi I}}{V + \epsilon_{V,M\Phi}} \left(1 - \frac{M_{\Phi R}}{M_{\Phi max}}\right). \quad S42$$

Here  $\lambda_{M\Phi}$  and  $\epsilon_{V,M\Phi}$  were fit and all other parameters were fixed to their estimated values (**Table S1**).

We infected mice with 75 TCID<sub>50</sub> influenza A/Puerto Rico/34/8 (PR8) and measured viral loads<sup>87</sup> and alveolar macrophages (F480<sup>hi</sup>CD11c<sup>hi</sup>CD11b<sup>+</sup>, see **Figure S3D-E**). Fitting **Eqs. S40-S42** to this data (**Figure S3D-E**) resulted in estimates of  $\lambda_{M\Phi} = 0.082$  TCID<sub>50</sub>/day,  $\epsilon_{V,M\Phi} = 63.1$  TCID<sub>50</sub>,  $M_{\Phi,max} = 5.02$  cells, and  $d_V = 1.43$ /day. To convert from TCID<sub>50</sub> to a viral copies (RNA copy number) per volume (ml) for the units in our model, we used correlations between these (**Figure S3C**) for influenza A matrix<sup>88</sup>. We assumed 3.5 TCID<sub>50</sub> was equivalent to  $2.19 \times 10^5$  virus copies<sup>89</sup> and took the ratio between the TCID<sub>50</sub>/100  $\mu$ l and  $10^6$  copies/100  $\mu$ l to be approximately 0.37 (**Figure S3C**). Thus, we set  $\lambda_{M\Phi} = 5.94 \times 10^3$  copies/ml/day and  $\epsilon_{V,M\Phi} = 905.22$  copies/ml in our simulations. We validated these estimates against data from Landsman and Jung<sup>4</sup> (not shown).

#### S4.2.1. *Production of GM-CSF by monocytes*

Lee et al.<sup>40</sup> measured the concentration of GM-CSF produced by adherent monocytes incubated with LPS over 72 hours (**Figure S3F**). To fit to this data, we developed a simplified submodel given by

$$\frac{dM}{dt} = \frac{p_{M,G} G_B^{h_M}}{G_B^{h_M} + \epsilon_{G,M}} - d_M M, \quad S43$$

$$\frac{dG_U}{dt} = \frac{p_{G,M}M}{M + \eta_{G,M}} - k_{lin_G}G_U - k_{B_G}(MA_G - G_B)G_U + k_{U_G}G_B, \quad S44$$

$$\frac{dG_B}{dt} = -k_{int_G}G_B + k_{B_G}(MA_G - G_B)G_U - k_{U_G}G_B, \quad S45$$

where the production of monocytes ( $M$ ) by bound GM-CSF ( $G_B$ ) was modelled by a Hill function. Parameters were calibrated to homeostasis and we found the production rate of monocytes by GM-CSF to be  $p_{M,G} = 7.29 \times 10^3$  cells/ml and the production of GM-CSF by monocytes to be  $p_{G,M} = 7.7 \times 10^5$  pg/ml/day through fitting to the GM-CSF measurements of Lee et al.<sup>40</sup> (**Figure S3F**).

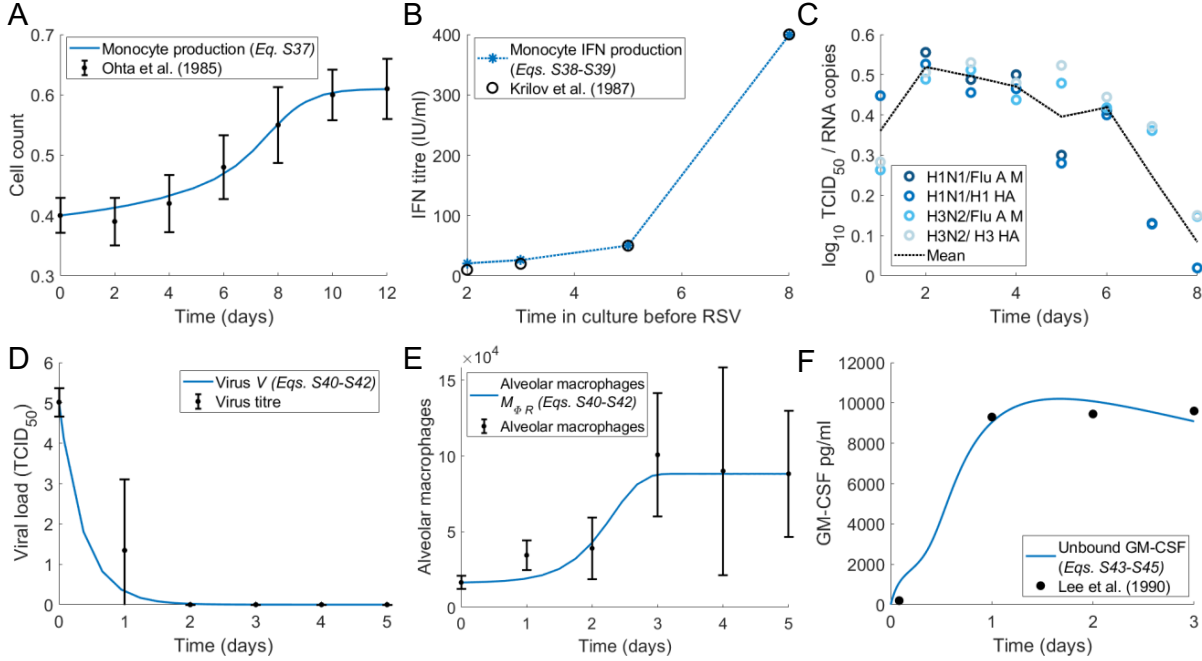

**Figure S3. Monocyte expansion and type I IFN production by monocytes, alveolar macrophage replenishment after viral infection, and GM-CSF production by monocytes.** **A)** Eq. S37 fit to time course of proliferation of monocytes in culture<sup>42</sup>. **B)** Fit of Eqs. S38-S39 to the production of IFN- $\alpha$  by monocytes after 24 hours with RSV as a function of the number of days of pre-culturing (1, 2, 4 or 7)<sup>43</sup>. **C)** Correlation between infectious virus titre and RT-PCR copy number for influenza A and B measured by Laurie et al.<sup>88</sup> The relative TCID<sub>50</sub> compared to the RNA copies is plotted for each virus strain and the mean as a black dashed line. **D-E)** Fit of Eqs. S40-S42 to viral loads<sup>87</sup> and alveolar macrophages from experimental influenza infections. **F)** The production of GM-CSF from stimulated monocytes was recorded by Lee et al.<sup>40</sup> Using a simplified version of the full model (Eqs. S43-S46), we obtained the production rates for monocytes and GM-CSF. Data (black) is plotted as either circles/stars (**B&F**) or mean and standard deviation error bars (**A,D-E**); solid blue line: corresponding fit.

#### S4.2.1. Production of IFN by infected cells

To determine the production rate of type I IFN by infected cells, we considered all immune populations to be zero in the full model (Eqs. S1-S22), giving

$$\frac{dV}{dt} = pI - d_V V, \quad S46$$

$$\frac{dS}{dt} = \lambda_S \left(1 - \frac{S+I}{S_{max}}\right) S - \beta S V, \quad S47$$



$$\frac{dI}{dt} = \frac{\beta}{1 + F_B/\epsilon_{F,I}} S(t - \tau_I)V(t - \tau_I) - d_I I, \quad S48$$

$$\frac{dF_U}{dt} = \psi_{prod,F}^* + \frac{p_{F,I}I}{I + \eta_{F,I}} - k_{lin_F}F_U - k_{B_F}(IA_F - F_B)F_U + k_{U_F}F_B, \quad S49$$

$$\frac{dF_B}{dt} = -k_{int_F}F_B + k_{B_F}(IA_F - F_B)F_U - k_{U_F}F_B. \quad S50$$

Here IFN is only produced by infected cells and so there is an additional homeostatic production of IFN,  $\psi_{prod,F}^*$ , to account for general macrophage and monocyte production.  $\psi_{prod,F}^*$  is obtained from calculating homeostasis for  $F_U$  and  $F_B$ , i.e.  $dF_U/dt = dF_B/dt = 0$ . Resistant cells ( $R$ ) were not considered in this model as the data was only measured over 1 day. By fixing all parameters to their previously established values (**Table S1**), and fitting  $p_{F,I}$  and  $\eta_{F,I}$ , we obtained  $p_{F,I} = 2.823 \times 10^4$  pg/ml/day and  $\eta_{F,I} = 0.00112$  pg/ml (**Figure S4A**). Since the concentration of IFN- $\alpha$  in patients infected with SARS-CoV-2 is lower than IFN- $\beta$ , we reduced the production rate to  $p_{F,I} = 2.823$  pg/ml/day so that model dynamics lay within the ranges of IFN- $\alpha$  exhibited by patients with SARS-CoV-2 infection (**Figure S6A-B** and Laing et al.<sup>80</sup>).

#### S4.2.2. *Production of IL-6 by infected cells*

To determine the rate of production of IL-6 by infected cells, Ye *et al*<sup>36</sup> measured the *in vitro* replication kinetics of H5N1 and H7N9 viruses in A549 cells. Cells were infected by either virus at an MOI of 2 and grown to confluence in sterile T75-tissue culture flasks (approximate cell number of  $8.4 \times 10^6$ )<sup>90</sup> and the concentration of IL-6 released from A549 cells in response to infection with both viruses was measured. We reduced the full model (**Eqs. S1-S22**) to only consider virus infection and IL-6 production by infected cells

$$\frac{dV}{dt} = pI - d_V V, \quad S51$$

$$\frac{dS}{dt} = -\beta SV, \quad S52$$

$$\frac{dI}{dt} = \beta SV - d_I I, \quad S53$$

$$\frac{dL_U}{dt} = \frac{p_{L,I}I}{I + \eta_{L,I}}. \quad S54$$

and fit to this data to obtain  $p_{L,I} = 11.887$  pg/ml and  $\eta_{L,I} = 0.7232 \times 10^9$  cells/ml (**Figure S4B-C**).

#### S4.2.3. *Production of IL-6 by alveolar macrophages*

We modelled the production of IL-6 by alveolar macrophages by

$$\frac{dL_U}{dt} = \frac{p_{L,M\Phi}M_{\Phi I}}{M_{\Phi I} + \eta_{L,M\Phi}} \quad S55$$

to compare to observations from Shibata et al.<sup>37</sup> who measured the production of IL-6 by alveolar macrophages stimulated by different concentrations of LPS. Assuming no proliferation of macrophages from LPS introduction but that LPS scales the production of IL-6, we modified the above equation to be

$$\frac{dL_U}{dt} = \frac{p_{L,M\Phi} M_{\Phi I}}{M_{\Phi I} + \eta_{L,M\Phi}} LPS,$$

and fit the Shibata et al. data and obtained  $p_{L,M\Phi} = 0.078$  ng/ml/hour and  $\eta_{L,M\Phi} = 4.47 \times 10^5$  cells/ml (**Figure S4D**).

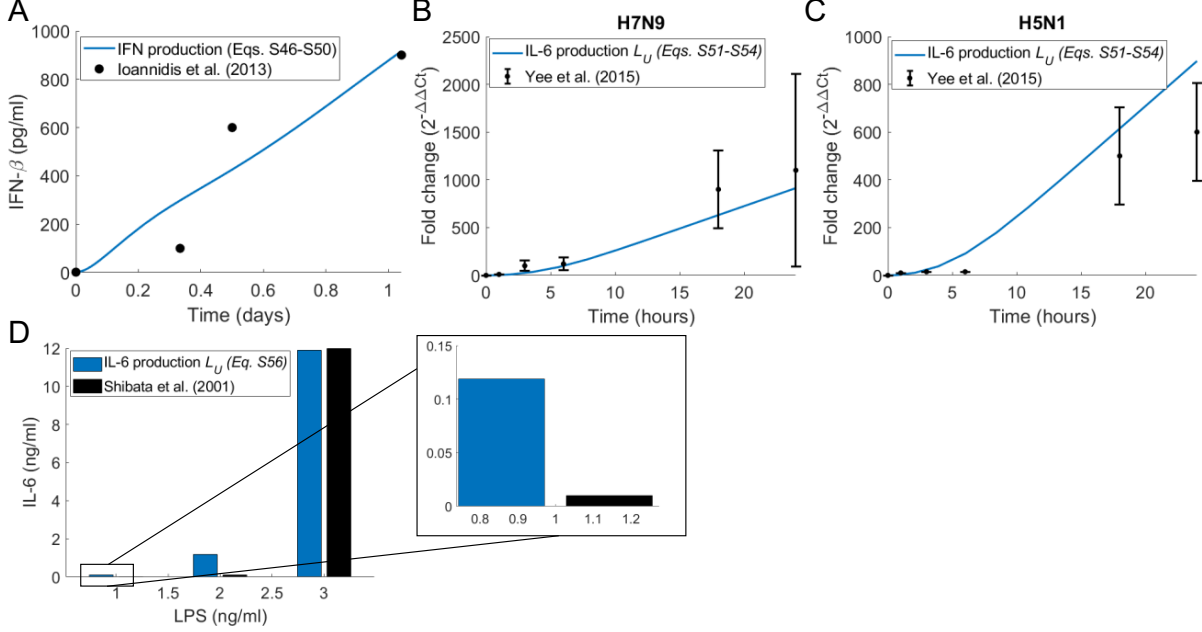

**Figure S4. Production of IFN and IL-6 by infected cells and macrophages.** **A)** Concentration of IFN-β released by alveolar epithelial cells in response to stimulation with influenza virus recorded at 8, 16 and 24 hours<sup>41</sup>. **B-C)** IL-6 production by infected cells in response to **A)** H5N1 and **B)** H7N9, measured by Yee et al.<sup>36</sup> Data (black) is plotted as mean and standard deviation error bars with the corresponding fit (Eqs. S51-S54) in solid blue. **D)** IL-6 production by macrophages (Eq. S56) in response to stimulation with LPS of varying dosage sizes. Shibata et al.<sup>37</sup> measured the production of IL-6 for different dosages of LPS and fitting the production rate to this data to obtain  $p_{L,M\Phi}$ ,  $\eta_{L,M\Phi}$ .

## S5. Parameters calculated from homeostasis

Remaining parameters in the model were estimated to ensure the model maintained homeostasis in the absence of infection, i.e. we required the system to return to equilibrium state after small perturbations in initial conditions for the immune cells and cytokines. Homeostasis equations are defined below (Eqs. S57-S70), along with the corresponding parameter they define. These were determined by solving  $d/dt = 0$ . At homeostasis we assume there to be no virus and resistant cells ( $V = R = 0$ ). Here  $X^*$  represents homeostatic values.

$$F_B(0) = F_B^* = \frac{k_{BF} T^* A_F F_U^*}{k_{intF} + k_{BF} F_U^* + k_{UF}}, \quad S57$$

$$G_B(0) = G_B^* = \frac{k_{BG} M^* A_G G_U^*}{k_{intG} + k_{BG} G_U^* + k_{UG}}, \quad S58$$

$$C_B(0) = C_B^* = \frac{k_{BC} C_U^{POWc} A_C N^*}{k_{intC} + k_{BC} C_U^{POWc} + k_{UC}}, \quad S59$$

$$C_{BF}(0) = C_{BF}^* = \frac{C_B^*}{A_C N^*}, \quad S60$$

$$L_B(0) = L_B^* = \frac{k_{BL} (T^* + N^* + M^*) A_L L_U^*}{k_{intL} + k_{BL} L_U^* + k_{UL}}, \quad S61$$

$$M_{\Phi I}(0) = M_{\Phi I}^* = \frac{\left( \frac{p_{M_{\Phi I},G} G_B^{*h_{M,M\Phi}} M^*}{G_B^{*h_{M,M\Phi}} + \epsilon_{G,M\Phi}} + \frac{p_{M_{\Phi I},L} L_B^* M^*}{L_B^* + \epsilon_{L,M\Phi}} \right)}{\left( 1 - \frac{M_{\Phi R}^*}{M_{\Phi max}^*} \right) \frac{\lambda_{M\Phi}}{\epsilon_{V,M\Phi}} + d_{M\Phi}}, \quad S62$$

$$\eta_{C,M} = \frac{p_{C,M} M^* - M^* (k_{in_C} C_U^* + k_{B_C} (N^* A_C - C_B^*) C_U^{*POW_C} - k_{U_C} C_B^*)}{k_{in_C} C_U^* + k_{B_C} (N^* A_C - C_B^*) C_U^{*POW_C} - k_{U_C} C_B^*}, \quad S63$$

$$p_{L,M\Phi} = \frac{M_{\Phi I}^* + \eta_{L,M\Phi}}{M_{\Phi I}^*} \left( -\frac{p_{L,M} M^*}{M^* + \eta_{L,M}} + k_{in_L} L_U^* + k_{B_L} ((N^* + T^* + M^*) A_L - L_B^*) L_U^* - k_{U_L} L_B^* \right), \quad S64$$

$$p_{G,M\Phi I} = \frac{k_{in_G} G_U^* + k_{B_G} (M^* A_G - G_B^*) G_U^* - k_{U_G} G_B^*}{\frac{M_{\Phi I}^*}{M_{\Phi I}^* + \eta_{G,M\Phi}} + \frac{M^*}{M^* + \eta_{G,M}}}, \quad S65$$

$$p_{M,G} = \left( \frac{G_B^{*h_M} + \epsilon_{G,M}^{h_M}}{G_B^{*h_M}} \right) \left( \frac{p_{M_{\Phi I},G} G_B^{*h_{M,M\Phi}} M^*}{G_B^{*h_{M,M\Phi}} + \epsilon_{G,M\Phi}} + \frac{p_{M_{\Phi I},L} L_B^* M^*}{L_B^* + \epsilon_{L,M\Phi}} + d_M M^* \right), \quad S66$$

$$\eta_{F,M\Phi} = \frac{p_{F,M\Phi} M_{\Phi I}^* + \left( \frac{p_{F,M} M^*}{M^* + \eta_{F,M}} - k_{in_F} F_U^* - k_{B_F} (T^* A_F - F_B^*) F_U^* + k_{U_F} F_B^* \right) M_{\Phi I}^*}{-\frac{p_{F,M} M^*}{M^* + \eta_{F,M}} + k_{in_F} F_U^* + k_{B_F} (T^* A_F - F_B^*) F_U^* - k_{U_F} F_B^*}, \quad S67$$

$$T_{prod}^* = d_T T^* - \frac{p_{T,L} L_B^* T^*}{L_B^* + \epsilon_{L,T}} - \frac{p_{T,F} F_B^* T^*}{F_B^* + \epsilon_{F,T}}, \quad S68$$

$$N_{prod}^* = \left( d_N N^* - \frac{p_{N,L} L_B^*}{L_B^* + \epsilon_{L,N}} \right) \frac{1}{NR}, \quad S69$$

$$M_{prod}^* = \frac{\frac{1}{MR} \left( \frac{p_{M_{\Phi I},G} G_B^{*h_{M,M\Phi}} M^*}{G_B^{*h_{M,M\Phi}} + \epsilon_{G,M\Phi}} + \frac{p_{M_{\Phi I},L} L_B^* M^*}{L_B^* + \epsilon_{L,M}} + d_M M^* \right) - \psi_M^{max} \frac{G_B^{*h_M}}{G_B^{*h_M} + \epsilon_{G,M}^{h_M}}}{1 - \frac{G_B^{*h_M}}{G_B^{*h_M} + \epsilon_{G,M}^{h_M}}}, \quad S70$$

The model was then simulated to confirm the parameter values determined resulted in a stable system at homeostasis (**Figure S5**).

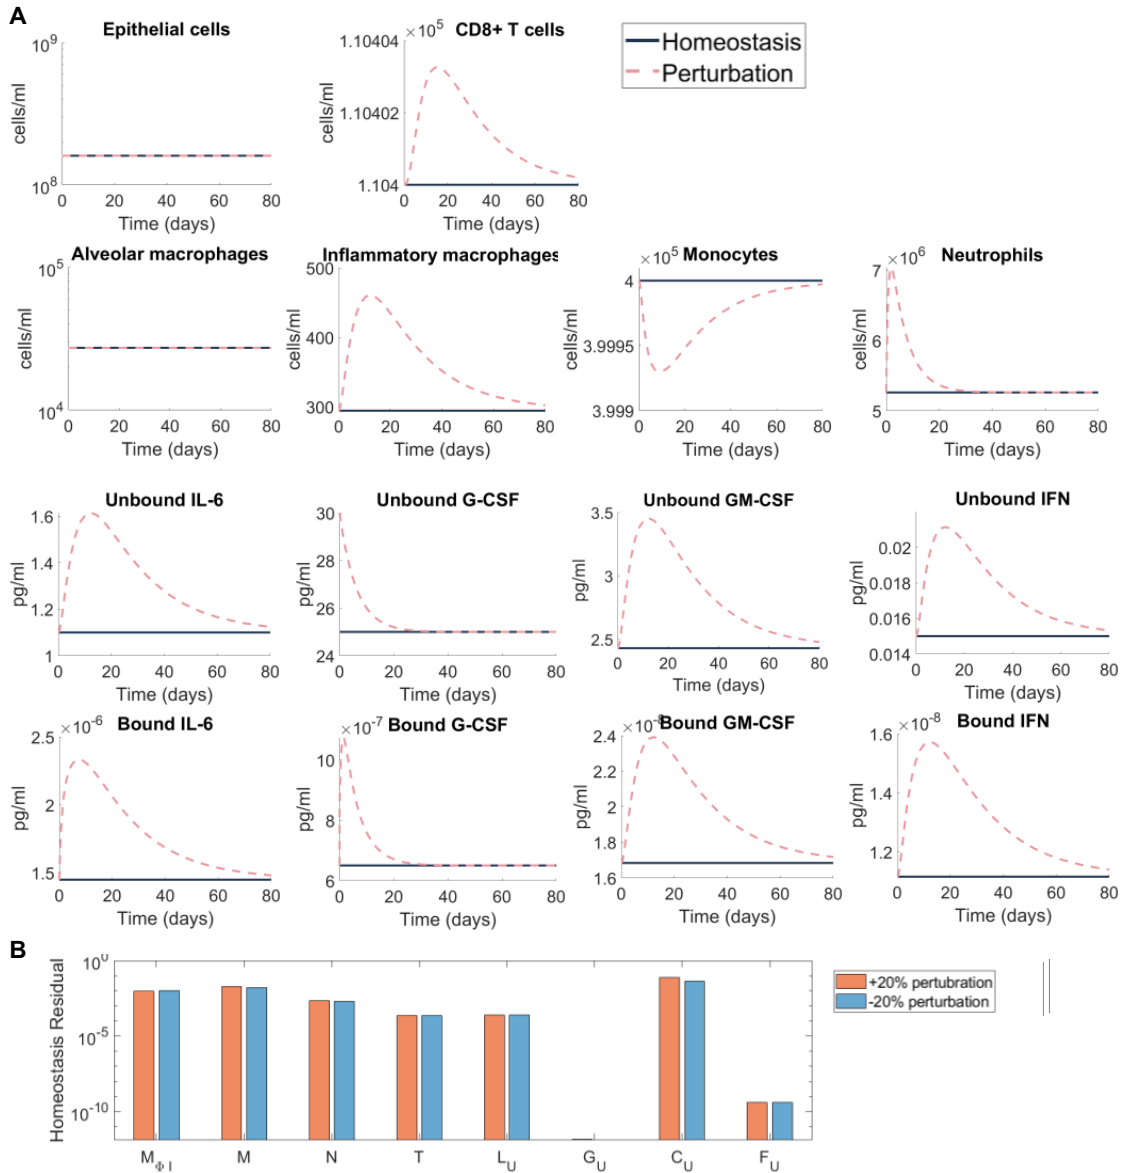

**Figure S5. Homeostatic disease-free system regulation.** *A)* To confirm that parameters in the model represented realistic immunocompetent individuals in the disease-free scenario, *Eqs. S1-S22* were simulated where  $V_0 = 0$  and parameters were given by the homeostasis *Eqs. S57-S70*. The initial concentration of G-CSF was perturbed and compared to simulations of the model at homeostasis. Simulations at homeostasis are represented by solid lines (purple) and perturbed simulations as dashed lines (pink). *B)* The maximum residual between variables and their initial conditions at day 50 was measured to confirm that the system was stable for perturbations in all immune cells and cytokines.

## **S6. Model predication validation and sensitivity analysis**

Having confirmed that predicted dynamics from the reduced IFN model (**Eqs. 31-37** and **Figure. 3, Main Text**) qualitatively matched to time-series measurements for IFN- $\alpha$  from Trouillet-Assant et al.<sup>70</sup> (**Figure S6A**), we next sought to further validate predictions of the full model by comparing IFN, IL-6, and G-CSF dynamics to previously published observations (**Figure S6B-F**). For this, measurements for IFN- $\alpha$ 2 and IL-6 plasma concentrations were taken from Trouillet-Assant et al.<sup>70</sup> (**Figure S6B-C**), and IL-6 concentrations from patients requiring and not requiring mechanical ventilation obtained by Herold et al.<sup>91</sup> were also used to validate predicted IL-6 dynamics (**Figure S6D**). IL-6 and G-CSF plasma concentrations in symptomatic and asymptomatic patients were obtained by Long et al.<sup>92</sup> (**Figure S6E-F**). Full model simulations are given in **Figure S7**.

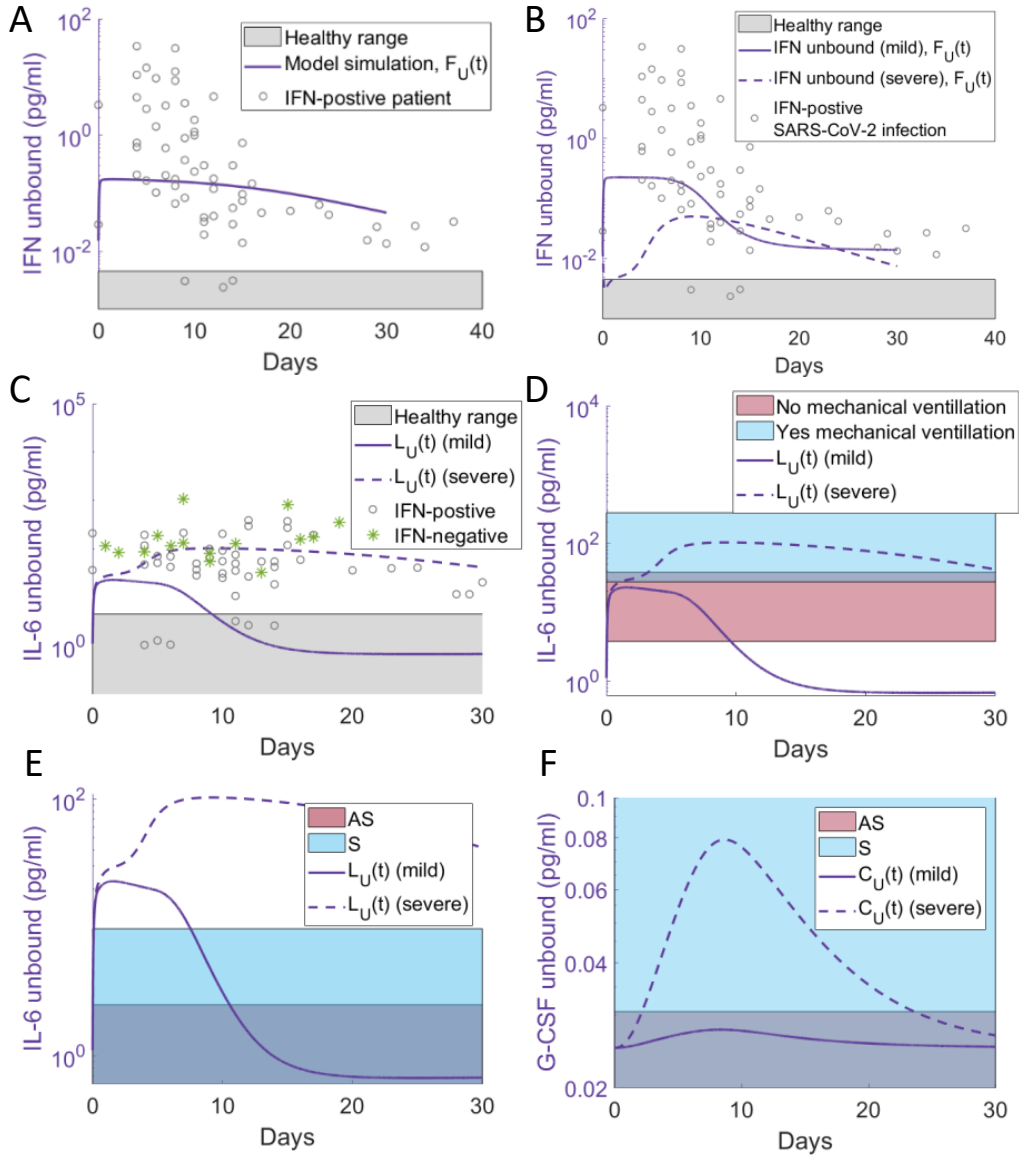

**Figure S6. Model validation against human cytokine measurements during SARS-CoV-2 infection.** **A)** IFN dynamics of the reduced model (**Figure 3 Main Text**) overlaid with patient IFN- $\alpha_2$  plasma concentrations from Trouillet-Assant et al.<sup>70</sup> The solid line (purple) represents the unbound IFN dynamics from the reduced model (**Eqs. 27-33**). Individual patient IFN- $\alpha_2$  measurements are plotted as grey circles. Normal IFN- $\alpha_2$  concentration in healthy volunteers are indicated by a grey area. **B-F)** Mild and severe dynamics (**Eqs. S1-S22**) corresponding to simulations in **Figure 4 Main Text** and **Figure S7** overlaid with measurements from the literature with solid lines: mild disease dynamics; dashed lines: severe disease dynamics. **B-C)** Plasma IFN- $\alpha$  and IL-6 in COVID-19 critically ill patients ( $n=26$ ) obtained by Trouillet-Assant et al.<sup>70</sup> overlaid with mild and severe unbound IFN ( $F_U(t)$ ) and mild and severe unbound IL-6 ( $L_U(t)$ ). **D)** IL-6 levels in patients requiring and not requiring mechanical ventilation obtained by Herold et al.<sup>91</sup> overlaid with mild and severe unbound IL-6 dynamics. **E-F)** IL-6 and G-CSF plasma concentration obtained by Long et al.<sup>92</sup> in symptomatic “S” and asymptomatic “AS” COVID-19 patients overlaid with corresponding mild and severe model dynamics.

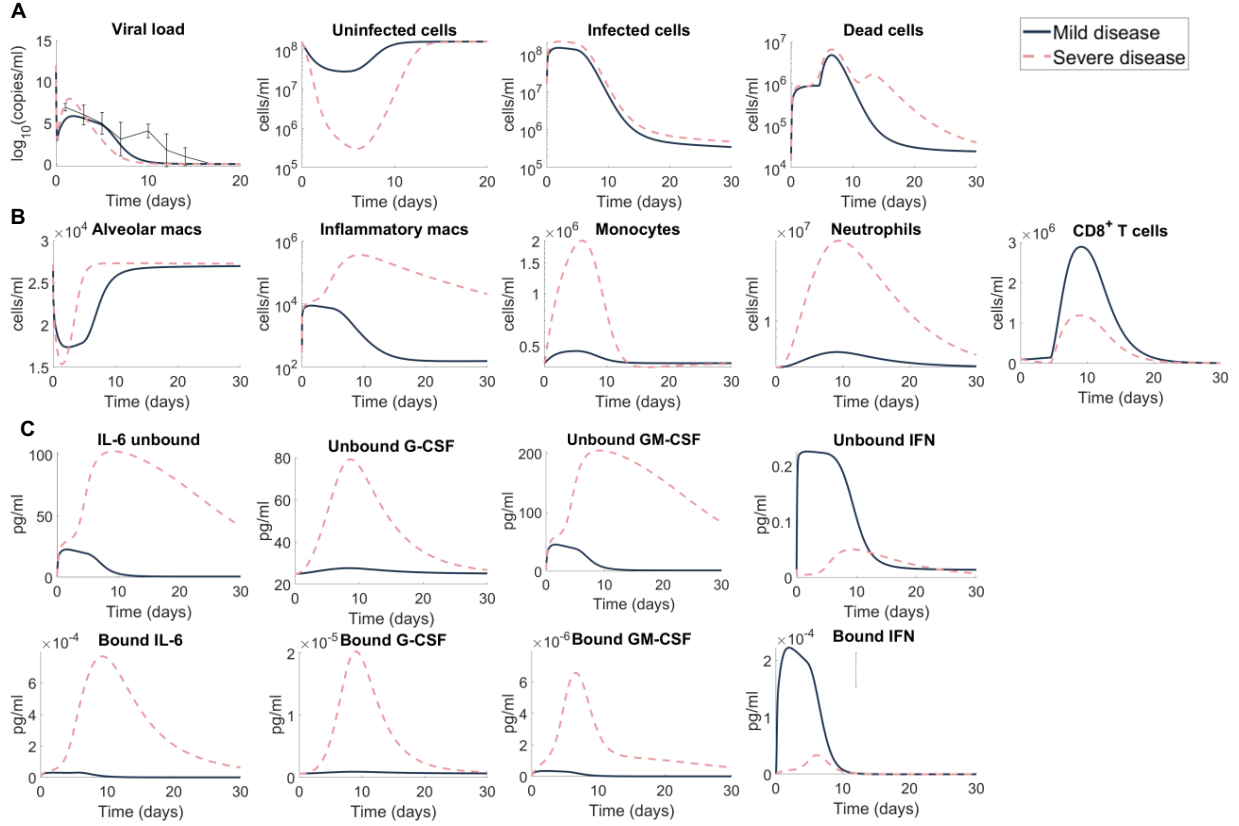

**Figure S7. Predicting mild and severe COVID-19 dynamics (all model variables).** Extension of results of mild and severe disease dynamics in **Figure 4 Main Text**. Mild disease (solid lines) dynamics obtained by using baseline parameter estimates (**Tables S1**) while severe disease dynamics (dashed lines) were obtained by decreasing the production rate of type I IFN,  $p_{F,I}$ , and increasing the production of monocytes,  $p_{M,I}$ , and their differentiation to macrophages,  $\eta_{F,M\Phi}$ . **A)** Lung cells concentrations (susceptible cells  $S(t)$ , resistant cells  $R(t)$ , infected cells  $I(t)$ , dead cells  $D(t)$  and virus  $V(t)$ ). Solid black line with error bars indicates macaque data (see **Fig. 2 Main Text**). **B)** Immune cell concentrations (resident macrophages  $M_{\Phi R}(t)$ , inflammatory macrophages  $M_{\Phi I}(t)$ , monocytes  $M(t)$ , neutrophils  $N(t)$  and T cells  $T(t)$ ). **C)** Bound and unbound cytokine concentrations (IL-6 unbound  $L_U(t)$  and bound  $L_B(t)$ , GM-CSF unbound  $G_U(t)$  and bound  $G_B(t)$ , G-CSF unbound  $C_U(t)$  and bound  $C_B(t)$ , type I IFN unbound  $F_U(t)$  and bound  $F_B(t)$ ).

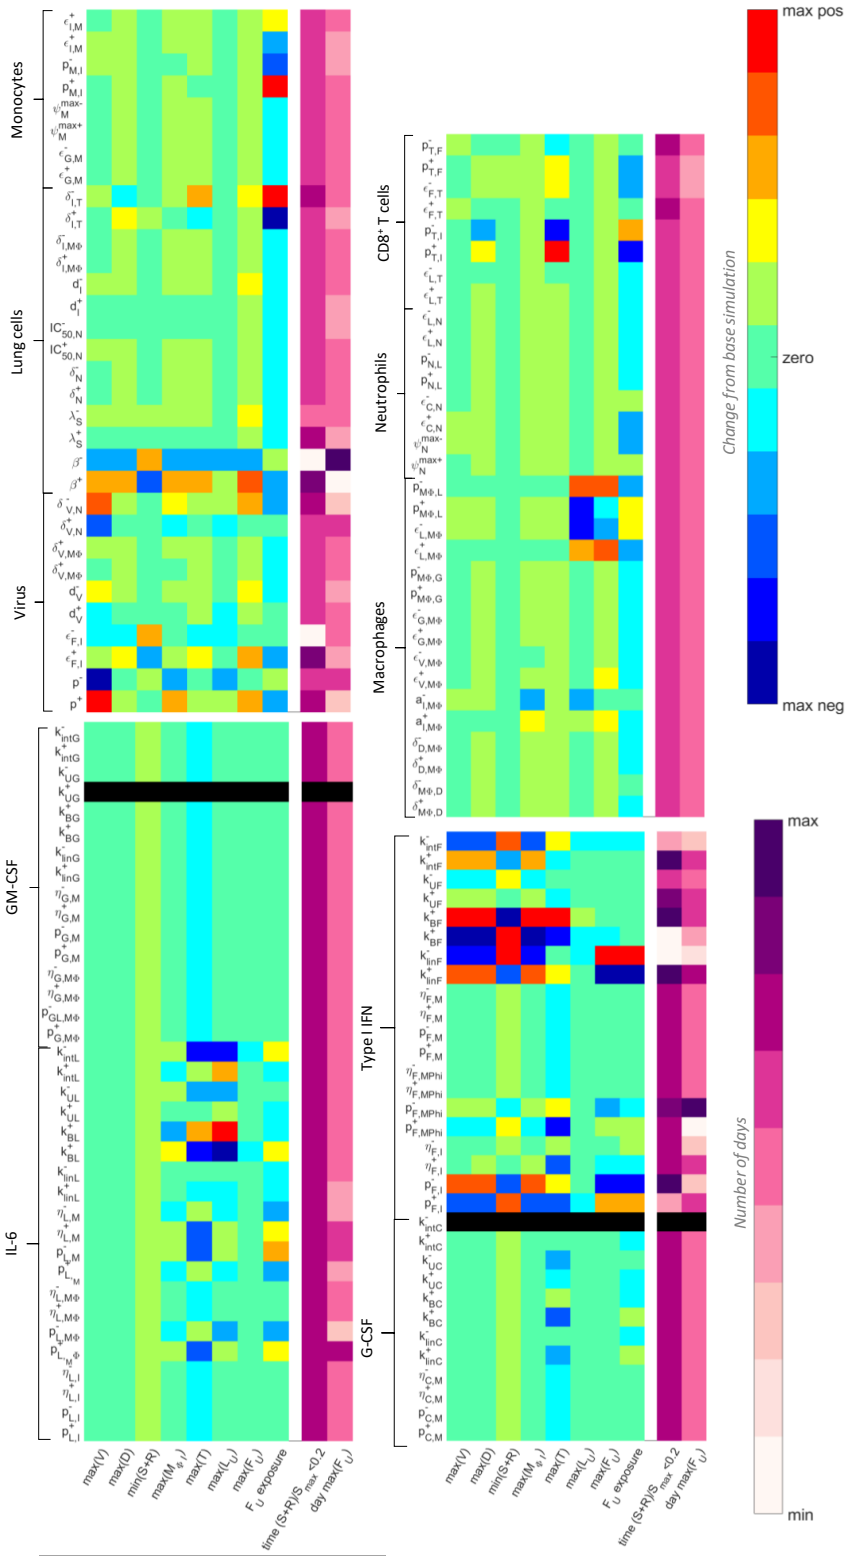

**Figure S8. Full analysis of parameters driving COVID-19 severity.** A local sensitivity analysis was performed by varying each parameter  $\pm 20\%$  from its originally estimated value and simulating the model. Predictions were then compared to baseline considering: Maximum viral load ( $\max(V)$ ), maximum concentration of dead cells ( $\max(D)$ ), minimum uninfected live cells ( $\min(S+R)$ ), maximum concentration of inflammatory macrophages ( $\max(M_{\Phi I})$ ), maximum number of CD8<sup>+</sup> T cells ( $\max(T)$ ), maximum concentration of IL-6 ( $\max(L_U)$ ), maximum concentration of type I IFN ( $\max(F_U)$ ), the total exposure to type I IFN ( $F_U$  exposure), the number of days damaged tissue was  $>80\%$  ( $\text{time}(S+R)/S_{\max} < 0.2$ ), and the day type I IFN reached its maximum (day  $\max(F_U)$ ). The heatmaps show the fold change of each metric, where blue signifies the minimum value observed and red signifies the maximum value observed, or by the number of days, where light to dark pink signifying increasing number of days from zero. The most sensitive parameters are shown in **Figure 5** in the **Main Text**.



### S6.1. Generating of virtual patients

Initial parameter sets for each virtual patient were drawn from normal distributions with means fixed to the corresponding parameter value in **Table S1** and standard deviations derived from appropriate standard deviation or confidence interval measurements in the literature. Specifically, the standard deviation for

- the half-effect concentration of IFN on viral infectivity ( $\epsilon_{F,I}$ ) was informed by the 95% confidence interval from fitting the Emax curve to MERS-CoV-expression nanoluciferase (nLUC) reported by Sheahan et al.<sup>15</sup>, from the IFN- $\alpha$  95% confidence interval on day 0 from Trouillet-Assant et al.<sup>70</sup> (**Figure S6B-C**),
- IFN production by infected cells ( $p_{F,I}$  and  $\eta_{F,I}$ ) and IFN production by macrophages ( $\eta_{F,M\Phi}$ ) were drawn from IL-6 concentration in no mechanical ventilation patients (mild) and mechanical ventilation patients (severe) from Herold et al.<sup>91</sup>,
- the production of IL-6 by macrophages and macrophages by IL-6 ( $p_{L,M\Phi}$ , and  $p_{M\Phi,L}$ ) from Liu et al.<sup>93</sup> (**Figure S6D**), and
- the production of monocytes by infected cells ( $p_{M,I}$ ), and from 95% confidence interval generated from estimating the parameter for production of IFN by monocytes<sup>42</sup> ( $p_{F,M}$ ; **Figure S3**).

From normal distributions with standard deviation described above and mean as the original parameter values ( $\hat{p}$ ), we then generated normal distributions covering 99.7% of values lying with 3 standard deviations of the mean, i.e.,  $[\mu - 3\sigma, \mu + 3\sigma]$ <sup>94</sup>.

After drawing an initial patient parameter set for each patient, we next used simulated annealing to determine a parameter set that resulted in patient dynamics within physiological ranges<sup>95</sup> for  $[l_i, u_i]$  by minimising **Eq. 15**, where  $l_i$  and  $u_i$  are the upper and lower bounds extracted from measurements for viral load, type I IFN, G-CSF, and IL-6 (**Figure 7 Main Text**). The resulting parameter set from this optimization was then considered to represent a realistic patient and they were accepted into the cohort. The viral, IFN, IL-6, and G-CSF dynamics of the cohort are seen in **Figure S9**, with the physiological ranges used for optimization.

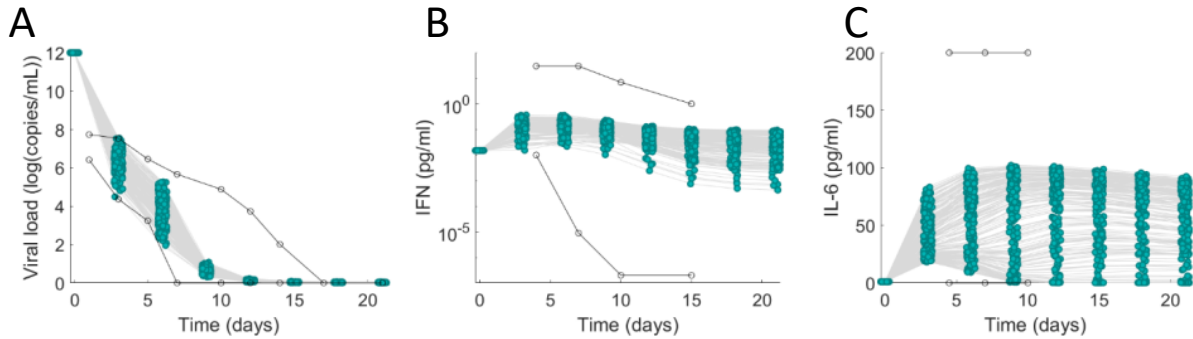

**Figure S9. Cohort dynamics within physiological ranges.** Virtual patients were generated so that viral load, IFN and IL-6 concentration were within physiological ranges obtained in the literature. The physiological ranges (denoted by open circles) were obtained from **A**) Munster et al.<sup>96</sup>, **B**) Trouillet-Assant et al.<sup>70</sup>, and **C**) Herold et al.<sup>91</sup>. Patient dynamics at discrete time points are plotted as joined green dots.

## References

1. Kim, K. *et al.* *Modelling SARS-CoV-2 Dynamics: Implications for Therapy.* (2020). doi:10.1101/2020.03.23.20040493.
2. Lawal, O. *et al.* Volatile organic compound signature from co-culture of lung epithelial cell line with *Pseudomonas aeruginosa*. *Analyst* **143**, 3148–3155 (2018).
3. Crapo, J. D., Barry, B. E., Gehr, P., Bachofen, M. & Weibel, E. R. Cell number and cell characteristics of the normal human lung. *Am. Rev. Respir. Dis.* **126**, 332–337 (1982).
4. Landsman, L. & Jung, S. Lung Macrophages Serve as Obligatory Intermediate between Blood Monocytes and Alveolar Macrophages. *J. Immunol.* **179**, 3488 (2007).
5. Ng, M.-L., Tan, S.-H., See, E.-E., Ooi, E.-E. & Ling, A.-E. Proliferative growth of SARS coronavirus in Vero E6 cells. *J. Gen. Virol.* **84**, 3291–3303 (2003).
6. Janeway, C. *Immunobiology 5 : the immune system in health and disease.* (Garland Pub., 2001).
7. Kratofil, R. M., Kubes, P. & Deniset, J. F. Monocyte conversion during inflammation and injury. *Arterioscler. Thromb. Vasc. Biol.* **37**, 35–42 (2017).
8. Jenner, A. L., Frascoli, F., Yun, C.-O. & Kim, P. S. Optimising Hydrogel Release Profiles for Viro-Immunotherapy Using Oncolytic Adenovirus Expressing IL-12 and GM-CSF with Immature Dendritic Cells. *Appl. Sci.* **10**, 2872 (2020).
9. Lee, J., Adler, F. R. & Kim, P. S. A mathematical model for the macrophage response to respiratory viral infection in normal and asthmatic conditions. *Bull. Math. Biol.* **79**, 1979–1998 (2017).
10. Pawelek, K. A., Dor Jr, D., Salmeron, C. & Handel, A. Within-host models of high and low pathogenic influenza virus infections: The role of macrophages. *PLoS One* **11**, 2016 (2016).
11. Zhang, N. & Bevan, M. J. CD8+ T Cells: Foot Soldiers of the Immune System. *Immunity* **35**, 161–168 (2011).
12. Baral, S., Antia, R. & Dixit, N. M. A dynamical motif comprising the interactions between antigens and CD8 T cells may underlie the outcomes of viral infections. *Proc. Natl. Acad. Sci.* **116**, 17393 (2019).
13. Cassidy, T., Humphries, A., Craig, M. & Mackey, M. Characterizing chemotherapy-induced neutropenia and monocytopenia through mathematical modelling. *Bull. Math. Biol.* **104**, 2020.04.02.022046 (2020).
14. Craig, M., Humphries, A. R. & Mackey, M. C. A Mathematical Model of Granulopoiesis Incorporating the Negative Feedback Dynamics and Kinetics of G-CSF/Neutrophil Binding and Internalization. *Bull. Math. Biol.* **78**, 2304–2357 (2016).
15. Sheahan, T. P. *et al.* Comparative therapeutic efficacy of remdesivir and combination lopinavir, ritonavir, and interferon beta against MERS-CoV. *Nat. Commun.* **11**, 222 (2020).
16. Chomarat, P., Banchereau, J., Davoust, J. & Palucka, A. K. IL-6 switches the differentiation of monocytes from dendritic cells to macrophages. *Nat. Immunol.* **1**, 510–514 (2000).
17. Sun, L. *et al.* GM-CSF Quantity Has a Selective Effect on Granulocytic vs. Monocytic Myeloid Development and Function. *Front. Immunol.* **9**, (2018).
18. Chen, B. D., Clark, C. R. & Chou, T. H. Granulocyte/macrophage colony-stimulating factor stimulates monocyte and tissue macrophage proliferation and enhances their

- responsiveness to macrophage colony-stimulating factor. *Blood* **71**, 997–1002 (1988).
19. Krummel, M. F. *et al.* Paracrine costimulation of IFN- $\gamma$  signaling by integrins modulates CD8 T cell differentiation. *Proc. Natl. Acad. Sci.* **115**, 11585–11590 (2018).
  20. Brandes, M., Klauschen, F., Kuchen, S. & Germain, R. N. A systems analysis identifies a feedforward inflammatory circuit leading to lethal influenza infection. *Cell* **154**, 197–212 (2013).
  21. Holsti, M. A. & Raulat, D. H. IL-6 and IL-1 synergize to stimulate IL-2 production and proliferation of peripheral T cells. *J. Immunol.* **143**, 2514 (1989).
  22. Knaapen, A. M. *et al.* Neutrophils cause oxidative DNA damage in alveolar epithelial cells. *Free Radic. Biol. Med.* **27**, 234–240 (1999).
  23. Rigden, R. C., Carrasco, C. P., Summerfield, A. & McCullough, K. C. Macrophage phagocytosis of foot-and-mouth disease virus may create infectious carriers. *Immunology* **106**, 537–548 (2002).
  24. Yoshioka, Y., Kitao, T., Kishino, T., Yamamuro, A. & Maeda, S. Nitric oxide protects macrophages from hydrogen peroxide-induced apoptosis by inducing the formation of catalase. *J. Immunol.* **176**, 4675–4681 (2006).
  25. Smith, P., Wang, S.-Z., Dowling, K. & Forsyth, K. Leucocyte populations in respiratory syncytial virus-induced bronchiolitis. *J. Paediatr. Child Health* **37**, 146–151 (2001).
  26. Lee, H. Y. *et al.* Simulation and Prediction of the Adaptive Immune Response to Influenza A Virus Infection □. **83**, 7151–7165 (2009).
  27. Klöditz, K. & Fadeel, B. Three cell deaths and a funeral: macrophage clearance of cells undergoing distinct modes of cell death. *Cell death Discov.* **5**, 1–9 (2019).
  28. Zent, C. & Elliott, M. R. Maxed out macs: physiologic cell clearance as a function of macrophage phagocytic capacity. *FEBS J.* **284**, 1021–1039 (2017).
  29. Hernandez Vargas, E. A. & Velasco-Hernandez, J. X. In-host Modelling of COVID-19 Kinetics in Humans. *medRxiv* 2020.03.26.20044487 (2020)  
doi:10.1101/2020.03.26.20044487.
  30. Elmore, S. Apoptosis: A Review of Programmed Cell Death. *Toxicol. Pathol.* **35**, 495–516 (2007).
  31. Ginhoux, F. & Williams, M. Tissue-Resident Macrophage Ontogeny and Homeostasis. *Immunity* **44**, 439–449 (2016).
  32. Eftimie, R. & Eftimie, G. Tumour-associated macrophages and oncolytic virotherapies: a mathematical investigation into a complex dynamics. *Lett. Biomath.* **5**, S6–S35 (2018).
  33. Patel, A. A. *et al.* The fate and lifespan of human monocyte subsets in steady state and systemic inflammation. *J. Exp. Med.* **214**, 1913–1923 (2017).
  34. Craig, M., Humphries, A. R. & Mackey, M. C. An upper bound for the half-removal time of neutrophils from circulation. *Blood* **128**, 1989–1991 (2016).
  35. Kim, P. S., Lee, P. P. & Levy, D. Modeling regulation mechanisms in the immune system. *J. Theor. Biol.* **246**, 33–69 (2007).
  36. Ye, S., Lowther, S. & Stambas, J. Inhibition of reactive oxygen species production ameliorates inflammation induced by influenza A viruses via upregulation of SOCS1 and SOCS3. *J. Virol.* **89**, 2672–2683 (2015).
  37. Shibata, Y. *et al.* GM-CSF Regulates Alveolar Macrophage Differentiation and Innate Immunity in the Lung through PU.1. *Immunity* **15**, 557–567 (2001).
  38. Alderson, M. R., Tough, T. W., Ziegler, S. F. & Grabstein, K. H. Interleukin 7 induces cytokine secretion and tumoricidal activity by human peripheral blood monocytes. *J. Exp.*

- Med.* **173**, 923–930 (1991).
39. Hallsworth, M. P., Soh, C. P., Lane, S. J., Arm, J. P. & Lee, T. H. Selective enhancement of GM-CSF, TNF-alpha, IL-1 beta and IL-8 production by monocytes and macrophages of asthmatic subjects. *Eur. Respir. J.* **7**, 1096 (1994).
  40. Lee, M.-T., Kaushansky, K., Ralph, P. & Ladner, M. B. Differential Expression of M-CSF, G-CSF, and GM-CSF by Human Monocytes. *J. Leukoc. Biol.* **47**, 275–282 (1990).
  41. Ioannidis, I., Ye, F., McNally, B., Willette, M. & Flaño, E. Toll-Like Receptor Expression and Induction of Type I and Type III Interferons in Primary Airway Epithelial Cells. *J. Virol.* **87**, 3261 (2013).
  42. Ohta, M., Okabe, T., Ozawa, K., Urabe, A. & Takaku, F.  $1\alpha,25$ -Dihydroxy vitamin D<sub>3</sub> (calcitriol) stimulates proliferation of human circulating monocytes in vitro. *FEBS Lett.* **185**, 9–13 (1985).
  43. Krilov, L. R., Hendry, R. M., Godfrey, E. & McIntosh, K. Respiratory Virus Infection of Peripheral Blood Monocytes: Correlation with Ageing of Cells and Interferon Production in vitro. *J. Gen. Virol.* **68**, 1749–1753 (1987).
  44. Mehra, R. *et al.* Soluble interleukin 6 receptor: a novel marker of moderate to severe sleep-related breathing disorder. *Arch. Intern. Med.* **166**, 1725–1731 (2006).
  45. Stagg, J., Wu, J. H., Bouganim, N. & Galipeau, J. Granulocyte-Macrophage Colony-Stimulating Factor and Interleukin-2 Fusion cDNA for Cancer Gene Immunotherapy. *Cancer Res.* **64**, 8795 (2004).
  46. Arnaud, P. Different interferons: Pharmacology, pharmacokinetics, proposed mechanisms, safety and side effects. *Rev. Med. Interne* **23**, 449S-458S (2002).
  47. Nesbitt, J. E. & Fuller, G. M. Dynamics of interleukin-6 internalization and degradation in rat hepatocytes. *J. Biol. Chem.* **267**, 5739–5742 (1992).
  48. Nicola, N. A., Peterson, L., Hilton, D. J. & Metcalf, D. Cellular processing of murine colony-stimulating factor (Multi-CSF, GM-CSF, G-CSF) receptors by normal hemopoietic cells and cell lines. *Growth Factors* **1**, 41–49 (1988).
  49. Mager, D. E. & Jusko, W. J. Receptor-Mediated Pharmacokinetic/Pharmacodynamic Model of Interferon- $\beta$  1a in Humans. *Pharm. Res.* **19**, 1537–1543 (2002).
  50. Tenhumberg, S. *et al.* Structure-guided Optimization of the Interleukin-6 Trans-signaling Antagonist sgp130. *J. Biol. Chem.* **283**, 27200–27207 (2008).
  51. Craig, M., Humphries, A. R. & Mackey, M. C. A Mathematical Model of Granulopoiesis Incorporating the Negative Feedback Dynamics and Kinetics of G-CSF/Neutrophil Binding and Internalization. *Bull. Math. Biol.* **78**, 2304–2357 (2016).
  52. Snyers, L. U. C., Fontaine, V. & Content, J. Modulation of Interleukin-6 Receptors in Human Cells. *Ann. N. Y. Acad. Sci.* **557**, 388–395 (1989).
  53. Taga, T., Kawanishi, Y., Hardy, R. R., Hirano, T. & Kishimoto, T. Receptors for B cell stimulatory factor 2. Quantitation, specificity, distribution, and regulation of their expression. *J. Exp. Med.* **166**, 967–981 (1987).
  54. Yamaguchi, M. *et al.* Down-regulation of interleukin 6 receptors of mouse myelomonocytic leukemic cells by leukemia inhibitory factor. *J. Biol. Chem.* **267**, (1992).
  55. Chiba, S. *et al.* Characterization and molecular features of the cell surface receptor for human granulocyte-macrophage colony-stimulating factor. *Leukemia* **4**, 29 (1990).
  56. Barreda, D. R., Hanington, P. C., Belosevic, M. & Belosevic, M. Regulation of myeloid development and function by colony stimulating factors. *Dev. Comp. Immunol.* **28**, 509–554 (2004).

57. Branca, A. A. Interferon receptors. *Vitr. Cell. Dev. Biol.* **24**, 155–165 (1988).
58. Constantinescu, S. N. *et al.* Role of interferon  $\alpha/\beta$  receptor chain 1 in the structure and transmembrane signaling of the interferon  $\alpha/\beta$  receptor complex. *Proc. Natl. Acad. Sci. U. S. A.* **91**, 9602–9606 (1994).
59. Recombinant human interleukin-6 (with HSA). vol. 2020.
60. Razelle, K. Granulocyte-macrophage colony-stimulating factor. *Holland-Frei Cancer Medicine* vol. 6 (2003).
61. IFN-beta recombinant protein :: Interferon-beta 1a Recombinant Protein. vol. 2020.
62. Armstrong, J. D., Gluck, E. H., Crapo, R. O., Jones, H. A. & Hughes, J. M. B. Lung tissue volume estimated by simultaneous radiographic and helium dilution methods. *Thorax* **37**, 676–679 (1982).
63. Chaffey, N. Alberts, B., Johnson, A., Lewis, J., Raff, M., Roberts, K. and Walter, P. Molecular biology of the cell. 4th edn. *Ann. Bot.* **91**, 401 (2003).
64. Uppal, S., Verma, S. & Dhot, P. Normal values of CD4 and CD8 lymphocyte subsets in healthy indian adults and the effects of sex, age, ethnicity, and smoking. *Cytom. Part B Clin. Cytom. J. Int. Soc. Anal. Cytol.* **52**, 32–36 (2003).
65. Gordon, C. L. *et al.* Tissue reservoirs of antiviral T cell immunity in persistent human CMV infection. *J. Exp. Med.* **214**, 651–667 (2017).
66. Maes, M. *et al.* Elevated serum interleukin-6 (IL-6) and IL-6 receptor concentrations in posttraumatic stress disorder following accidental man-made traumatic events. *Biol. Psychiatry* **45**, (1999).
67. Lee, J., Kim, Y., Lim, J., Kim, M. & Han, K. G-CSF and GM-CSF concentrations and receptor expression in peripheral blood leukemic cells from patients with chronic myelogenous leukemia. *Ann. Clin. Lab. Sci.* **38**, 331–337 (2008).
68. Suzuki, K. *et al.* Circulating cytokines and hormones with immunosuppressive but neutrophil-priming potentials rise after endurance exercise in humans. *Eur. J. Appl. Physiol.* **81**, 281–287 (2000).
69. Rodero, M. P. *et al.* Detection of interferon alpha protein reveals differential levels and cellular sources in disease. *J. Exp. Med.* **214**, 1547–1555 (2017).
70. Trouillet-Assant, S. *et al.* Type I IFN immunoprofiling in COVID-19 patients. *J. Allergy Clin. Immunol.* 4–8 (2020) doi:10.1016/j.jaci.2020.04.029.
71. Kasperska-Zajac, A., Sztylc, J., Machura, E. & Jop, G. Plasma IL-6 concentration correlates with clinical disease activity and serum C-reactive protein concentration in chronic urticaria patients. *Clin. Exp. Allergy* **41**, 1386–1391 (2011).
72. Sharma, R. & Sharma, S. Physiology, Blood Volume. in *StatPearls [Internet]* (StatPearls Publishing, 2018).
73. Cose, S., Brammer, C., Khanna, K. M., Masopust, D. & Lefrançois, L. Evidence that a significant number of naive T cells enter non-lymphoid organs as part of a normal migratory pathway. *Eur. J. Immunol.* **36**, 1423–1433 (2006).
74. Mager, D. & Jusko, W. Development of translational pharmacokinetic--pharmacodynamic models. *Clin. Pharmacol. Ther.* **83**, 909–912 (2008).
75. de Pillis, L. *et al.* Mathematical model creation for cancer chemo-immunotherapy. *Comput. Math. Methods Med.* **10**, 165–184 (2009).
76. Tura, S., Cavo, M. & Zinzani, P. L. *Hematology. Pathophysiology, Diagnosis and Treatment.* (2018).
77. Jones, G. Fitting and handling dose response data. *J. Comput. Aided. Mol. Des.* **29**, 1–11

- (2015).
78. Macdougall, J. Analysis of dose--response studies—E max model. in *Dose finding in drug development* 127–145 (2006).
  79. Smith, R. J. & Bowman, B. J. Generation of hydrogen peroxide by human neutrophils: effects of soluble stimuli and requirements for divalent cations. *Clin. Immunol. Immunopathol.* **24**, 194–203 (1982).
  80. Laing, A. G. *et al.* A dynamic COVID-19 immune signature includes associations with poor prognosis. *Nat. Med.* (2020) doi:10.1038/s41591-020-1038-6.
  81. Weiss, S. J., Young, J., LoBuglio, A. F., Slivka, A. & Nimeh, N. Role of hydrogen peroxide in neutrophil-mediated destruction of cultured endothelial cells. *J. Clin. Investig.* **68**, 714–721 (1981).
  82. Shi, Y. *et al.* Granulocyte-macrophage colony-stimulating factor (GM-CSF) and T-cell responses: what we do and don't know. *Cell Res.* **16**, 126–133 (2006).
  83. Rösler, B. & Herold, S. Lung epithelial GM-CSF improves host defense function and epithelial repair in influenza virus pneumonia—a new therapeutic strategy? *Mol. Cell. Pediatr.* **3**, 29 (2016).
  84. Pignatti, P. *et al.* High circulating levels of biologically inactive IL-6/SIL-6 receptor complexes in systemic juvenile idiopathic arthritis: evidence for serum factors interfering with the binding to gp130. *Clin. Exp. Immunol.* **131**, 355–363 (2003).
  85. Morris, G. E. *et al.* Agonists of toll-like receptors 2 and 4 activate airway smooth muscle via mononuclear leukocytes. *Am. J. Respir. Crit. Care Med.* **171**, 814–822 (2005).
  86. Denney, L. & Ho, L.-P. The role of respiratory epithelium in host defence against influenza virus infection. *Biomed. J.* **41**, 218–233 (2018).
  87. Smith, A. P., Moquin, D. J., Bernhauerova, V. & Smith, A. M. Influenza virus infection model with density dependence supports biphasic viral decay. *Front. Microbiol.* **9**, 1554 (2018).
  88. Laurie, K. L. *et al.* Interval between infections and viral hierarchy are determinants of viral interference following influenza virus infection in a ferret model. *J. Infect. Dis.* **212**, 1701–1710 (2015).
  89. Cao, P. *et al.* Innate immunity and the inter-exposure interval determine the dynamics of secondary influenza virus infection and explain observed viral hierarchies. *PLoS Comput. Biol.* **11**, (2015).
  90. Lam, W., Yeung, A. C., Chu, I. M. & Chan, P. K. Profiles of cytokine and chemokine gene expression in human pulmonary epithelial cells induced by human and avian influenza viruses. *Virology* **7**, 344 (2010).
  91. Herold, T. *et al.* Elevated levels of interleukin-6 and CRP predict the need for mechanical ventilation in COVID-19. *J. Allergy Clin. Immunol.* (2020).
  92. Long, Q.-X. *et al.* Clinical and immunological assessment of asymptomatic SARS-CoV-2 infections. *Nat. Med.* 1–5 (2020).
  93. Liu, J. *et al.* Longitudinal characteristics of lymphocyte responses and cytokine profiles in the peripheral blood of SARS-CoV-2 infected patients. *EBioMedicine* 102763 (2020).
  94. Cassidy, T. & Craig, M. Determinants of combination GM-CSF immunotherapy and oncolytic virotherapy success identified through in silico treatment personalization. *PLoS Comput. Biol.* **15**, (2019).
  95. Allen, R. J., Rieger, T. R. & Musante, C. J. Efficient Generation and Selection of Virtual Populations in Quantitative Systems Pharmacology Models. *CPT Pharmacometrics Syst.*

- Pharmacol.* **5**, 140–146 (2016).
96. Munster, V. J. *et al.* Respiratory disease in rhesus macaques inoculated with SARS-CoV-2. *Nature* (2020) doi:10.1038/s41586-020-2324-7.
